# Supplementary material
Source: MDPI journal article supplement (https://www.mdpi.com/2227-9717/9/5/893)
Supplement: s1 [file s1]

# Multi-Step Subcritical Water Extracts of *Fucus vesiculosus* L. and *Codium tomentosum* Stackhouse: Composition, Health-Benefits and Safety

Cristina Soares<sup>1</sup>, Paula Paíga<sup>1</sup>, Marta Marques<sup>2</sup>, Tânia Neto<sup>2</sup>, Ana Paula Carvalho<sup>3</sup>, Alexandre Paiva<sup>2</sup>, Pedro Simões<sup>2</sup>, Leonor Costa<sup>4</sup>, Ana Bernardo<sup>4</sup>, Naiara Fernández<sup>4</sup>, Edgar Pinto<sup>5,6</sup>, Agostinho Almeida<sup>5</sup>, Maria Rosário Bronze<sup>4,7,8</sup>, Cristina Delerue-Matos<sup>1</sup> and Clara Grosso<sup>1,\*</sup>

<sup>1</sup> LAQV, REQUIMTE, Instituto Superior de Engenharia do Instituto Politécnico do Porto, Rua Dr. António Bernardino de Almeida 431, 4249-015 Porto, Portugal; cmdss@isep.ipp.pt (C.S.); pcpa@isep.ipp.pt (P.P.); apcarvalho@porto.ucp.pt (A.P.C.); cmm@isep.ipp.pt (C.D.-M.)

<sup>2</sup> LAQV, REQUIMTE, Departamento de Química, Faculdade de Ciências e Tecnologia, Universidade NOVA de Lisboa, Quinta da Torre, 2829-516 Caparica, Portugal; ma.marques@campus.fct.unl.pt (M.M.); ts.neto@campus.fct.unl.pt (T.N.); abp08838@fct.unl.pt (A.P.); pcs@fct.unl.pt (P.S.)

<sup>3</sup> CBQF—Centro de Biotecnologia e Química Fina—Laboratório Associado, Escola Superior de Biotecnologia, Universidade Católica Portuguesa, Rua Diogo Botelho 1327, 4169-005 Porto, Portugal

<sup>4</sup> iBET, Instituto de Biologia Experimental e Tecnológica, Apartado 12, 2781-901 Oeiras, Portugal; leonor.costa@ibet.pt (L.C.); ana.bernardo@ibet.pt (A.B.); naiara.fernandez@ibet.pt (N.F.); mbronze@ibet.pt (M.R.B.)

<sup>5</sup> LAQV, REQUIMTE, Departamento de Ciências Químicas, Laboratório de Química Aplicada, Faculdade de Farmácia, Universidade do Porto, Rua de Jorge Viterbo Ferreira 228, 4050-313, Porto, Portugal; aalmeida@ff.up.pt (A.A.)

<sup>6</sup> Departamento de Saúde Ambiental, Escola Superior de Saúde, Instituto Politécnico do Porto, R. Dr. António Bernardino de Almeida 400, 4200-072 Porto, Portugal; ecp@ess.ipp.pt (E.P.)

<sup>7</sup> Instituto de Tecnologia Química e Biológica António Xavier, Universidade Nova de Lisboa, Av. da República, 2780-157 Oeiras, Portugal

<sup>8</sup> FFULisboa, Faculty of Pharmacy, University of Lisbon, Avenida Professor Gama Pinto, 1649-003, Portugal

\* Correspondence: claragrosso@graq.isep.ipp.pt; Tel.: +351-228340537

## List of tables

| Table     |                                                                                                                                                                                                                                                     | Page |
|-----------|-----------------------------------------------------------------------------------------------------------------------------------------------------------------------------------------------------------------------------------------------------|------|
| Table S1. | Pharmaceuticals, metabolites, transformation products, isotopically labelled internal standards (ILIS), chemical abstracts service (CAS), formula, molecular weight, supplier company, and solvent used for the preparation of each stock solution. |      |
| Table S2. | Pesticides, transformation products, isotopically labelled internal standards (ILIS), chemical abstracts service (CAS), formula, molecular weight, supplier company, and solvent used for the preparation of each stock solution.                   |      |
| Table S3. | Concentration in the standards and in the analysed samples of the fifteen isotopically labelled internal standards (ILIS).                                                                                                                          |      |
| Table S4. | Therapeutic class, pharmaceuticals, ionization mode, precursor and product ions, mass spectrometry conditions, ion ratio, and isotopically labelled internal standards (ILIS) for each pharmaceutical in study. Legend: P- Chromatographic program. |      |
| Table S5. | Chemical family, pesticides type, name of each pesticides, ionization mode, precursor and product ions, mass spectrometry conditions, ion ratio, and isotopically labelled internal standards (ILIS). Legend: P- Chromatographic program.           |      |
| Table S6. | Chromatographic programs and mass spectrometry conditions used in the negative and positive ionization modes for pharmaceutical and pesticides analysis.                                                                                            |      |
| Table S7. | Retention time, regression, detection and quantitation limits for each transition and ion ratio for each pharmaceutical.                                                                                                                            |      |
| Table S8. | Retention time, regression, detection and quantitation limits for each transition and ion ratio for each pesticide.                                                                                                                                 |      |

**Table S1.** Pharmaceuticals, metabolites, transformation products, isotopically labelled internal standards (ILIS), chemical abstracts service (CAS), formula, molecular weight, supplier company, and solvent used for the preparation of each stock solution.

| Pharmaceuticals, metabolites, transformation products, and Isotopically Labelled Internal Standards (ILIS) <sup>Note 1</sup> | CAS <sup>Note 2,3</sup>    | Formula (Molecular Weight) <sup>Note 3</sup>                                                                                                                                                                                         | Supplier Company                     | Solvent used for the preparation of each stock solution   |
|------------------------------------------------------------------------------------------------------------------------------|----------------------------|--------------------------------------------------------------------------------------------------------------------------------------------------------------------------------------------------------------------------------------|--------------------------------------|-----------------------------------------------------------|
| <b>Acetaminophen</b>                                                                                                         | 103-90-2                   | C <sub>8</sub> H <sub>9</sub> NO <sub>2</sub> (MW=151.165 g/mol)                                                                                                                                                                     | Sigma-Aldrich (Madrid, Spain)        | Acetonitrile                                              |
| <b>Acetylsalicylic acid</b>                                                                                                  | 50-78-2                    | C <sub>9</sub> H <sub>8</sub> O <sub>4</sub> (MW= 180.159 g/mol)                                                                                                                                                                     | Sigma-Aldrich (Madrid, Spain)        | Acetonitrile                                              |
| <b>Alprazolam</b>                                                                                                            | 28981-97-7                 | C <sub>17</sub> H <sub>13</sub> ClN <sub>4</sub> (MW= 308.77 g/mol)                                                                                                                                                                  | Lipomed AG (Arllesheim, Switzerland) | Methanol                                                  |
| <b>Amfepramone</b>                                                                                                           | 134-80-5<br>90-84-6        | C <sub>13</sub> H <sub>20</sub> CINO ( <b>Amfepramone hydrochloride</b> ) (MW= 241.76 g/mol)<br>C <sub>13</sub> H <sub>19</sub> NO (MW= 205.301 g/mol)                                                                               | Lipomed AG (Arllesheim, Switzerland) | Methanol                                                  |
| <b>Amoxicillin</b>                                                                                                           | 61336-70-7<br>26787-78-0   | C <sub>16</sub> H <sub>25</sub> N <sub>3</sub> O <sub>6</sub> S ( <b>Amoxicillin trihydrate</b> ) (MW= 419.449 g/mol)<br>C <sub>16</sub> H <sub>19</sub> N <sub>3</sub> O <sub>6</sub> S (MW= 365.404 g/mol)                         | Sigma-Aldrich (Madrid, Spain)        | Methanol-Milli-Q water (2:1, v/v)                         |
| <b>Ampicillin</b>                                                                                                            | 7177-48-2                  | C <sub>16</sub> H <sub>19</sub> N <sub>3</sub> O <sub>4</sub> S (MW= 349.5 g/mol)                                                                                                                                                    | Sigma-Aldrich (Madrid, Spain)        | Acetonitrile-metanol (1:1, v/v)                           |
| <b>Atenolol</b>                                                                                                              | 29122-68-7                 | C <sub>14</sub> H <sub>22</sub> N <sub>2</sub> O <sub>3</sub> (MW= 266.341 g/mol)                                                                                                                                                    | Sigma-Aldrich (Madrid, Spain)        | Methanol                                                  |
| <b>Atorvastatin</b>                                                                                                          | 344423-98-9<br>134523-00-5 | C <sub>66</sub> H <sub>74</sub> CaF <sub>2</sub> N <sub>4</sub> O <sub>13</sub> ( <b>Atorvastatin calcium trihydrate</b> ) (MW= 1209.408 g/mol)<br>C <sub>33</sub> H <sub>36</sub> FN <sub>2</sub> O <sub>5</sub> (MW= 558.65 g/mol) | Sigma-Aldrich (Madrid, Spain)        | Acetonitrile-5% acetic acid in Milli-Q water              |
| <b>Azithromycin</b>                                                                                                          | 83905-01-5                 | C <sub>38</sub> H <sub>72</sub> N <sub>2</sub> O <sub>12</sub> (MW= 748.996 g/mol)                                                                                                                                                   | Sigma-Aldrich (Madrid, Spain)        | Methanol                                                  |
| <b>Bupropion</b>                                                                                                             | 31677-93-7<br>34911-55-2   | C <sub>13</sub> H <sub>19</sub> Cl <sub>2</sub> NO ( <b>Bupropion hydrochloride</b> ) (MW= 276.201 g/mol)<br>C <sub>13</sub> H <sub>18</sub> CINO (MW= 239.743 g/mol)                                                                | Lipomed AG (Arllesheim, Switzerland) | Methanol                                                  |
| <b>Caffeine</b>                                                                                                              | 58-08-2                    | C <sub>8</sub> H <sub>10</sub> N <sub>4</sub> O <sub>2</sub> (MW= 194.194 g/mol)                                                                                                                                                     | Sigma-Aldrich (Madrid, Spain)        | Methanol                                                  |
| <b>Carbamazepine</b>                                                                                                         | 298-46-4                   | C <sub>15</sub> H <sub>12</sub> N <sub>2</sub> O (MW= 236.274 g/mol)                                                                                                                                                                 | Sigma-Aldrich (Madrid, Spain)        | Methanol                                                  |
| <b>Carboxybupropfen</b>                                                                                                      | 15935-54-3                 | C <sub>13</sub> H <sub>16</sub> O <sub>4</sub> (MW= 236.267 g/mol)                                                                                                                                                                   | Sigma-Aldrich (Madrid, Spain)        | Acetonitrile                                              |
| <b>Chlorpromazine</b>                                                                                                        | 69-09-0<br>318.863         | C <sub>17</sub> H <sub>20</sub> Cl <sub>2</sub> N <sub>2</sub> S ( <b>Chlorpromazine hydrochloride</b> ) (MW= 355.321 g/mol)<br>C <sub>17</sub> H <sub>19</sub> CIN <sub>2</sub> S (MW= 318.863 g/mol)                               | Sigma-Aldrich (Madrid, Spain)        | Methanol-Milli-Q water                                    |
| <b>Chlortetracycline</b>                                                                                                     | 64-72-2<br>57-62-5         | C <sub>22</sub> H <sub>24</sub> Cl <sub>2</sub> N <sub>2</sub> O <sub>8</sub> ( <b>Chlortetracycline hydrochloride</b> ) (MW= 515.34 g/mol)<br>C <sub>22</sub> H <sub>23</sub> CIN <sub>2</sub> O <sub>8</sub> (MW= 478.882 g/mol)   | Sigma-Aldrich (Madrid, Spain)        | Acetonitrile-metanol (1:1, v/v)                           |
| <b>Ciprofloxacin</b>                                                                                                         | 85721-33-1                 | C <sub>17</sub> H <sub>18</sub> FN <sub>3</sub> O <sub>3</sub> (MW= 331.347 g/mol)                                                                                                                                                   | Sigma-Aldrich (Madrid, Spain)        | Milli-Q Water-10% acetic acid in Milli-Q water (1:1, v/v) |
| <b>Citalopram</b>                                                                                                            | 59729-33-8                 | C <sub>20</sub> H <sub>21</sub> FN <sub>2</sub> O (MW= 324.399 g/mol)                                                                                                                                                                | Sigma-Aldrich (Madrid, Spain)        | Methanol                                                  |
| <b>Citalopram N-oxide</b>                                                                                                    | 62498-71-9<br>917482-45-2  | C <sub>20</sub> H <sub>22</sub> ClFN <sub>2</sub> O <sub>2</sub> ( <b>Citalopram N-oxide hydrochloride</b> ) (MW= 376.856 g/mol)<br>C <sub>20</sub> H <sub>21</sub> FN <sub>2</sub> O <sub>2</sub> (MW= 340.398 g/mol)               | H. Lundbeck (Copenhagen, Denmark)    | Methanol                                                  |
| <b>Citalopram propionic acid*</b>                                                                                            | Not Available              | C <sub>18</sub> H <sub>14</sub> FNO <sub>3</sub> (MW= 311.312 g/mol)                                                                                                                                                                 | H. Lundbeck (Copenhagen, Denmark)    | Methanol                                                  |
| <b>Clarithromycin</b>                                                                                                        | 81103-11-9                 | C <sub>38</sub> H <sub>69</sub> NO <sub>13</sub> (MW= 747.964 g/mol)                                                                                                                                                                 | Sigma-Aldrich (Madrid, Spain)        | Methanol                                                  |
| <b>Clobenzorex</b>                                                                                                           | 5843-53-8<br>13364-32-4    | C <sub>16</sub> H <sub>19</sub> Cl <sub>2</sub> N ( <b>Clobenzorex hydrochloride</b> ) (MW= 296.235 g/mol)<br>C <sub>16</sub> H <sub>18</sub> CIN (MW= 259.777 g/mol)                                                                | LGC (Middlesex, UK)                  | Methanol                                                  |
| <b>d-Cathine</b>                                                                                                             | 2153-98-2                  | C <sub>9</sub> H <sub>14</sub> CINO ( <b>d-Cathine hydrochloride</b> ) (MW= 187.667 g/mol)                                                                                                                                           | Lipomed AG (Arllesheim, Switzerland) | Methanol                                                  |
| <b>Demethylcitalopram</b>                                                                                                    | 97743-99-2<br>62498-67-3   | C <sub>19</sub> H <sub>20</sub> ClFN <sub>2</sub> O ( <b>Demethylcitalopram hydrochloride</b> ) (MW= 346.83 g/mol)<br>C <sub>19</sub> H <sub>19</sub> FN <sup>2</sup> O                                                              | H. Lundbeck (Copenhagen, Denmark)    | Methanol                                                  |
| <b>Diazepam</b>                                                                                                              | 439-14-5                   | C <sub>16</sub> H <sub>13</sub> CIN <sub>2</sub> O (MW= 284.743 g/mol)                                                                                                                                                               | Lipomed AG (Arllesheim, Switzerland) | Methanol                                                  |
| <b>Diclofenac</b>                                                                                                            | 15307-79-6                 | C <sub>14</sub> H <sub>10</sub> Cl <sub>2</sub> NNaO <sub>2</sub> ( <b>Diclofenac sodium salt</b> ) (MW= 318.12 g/mol)                                                                                                               | Sigma-Aldrich (Madrid, Spain)        | Acetonitrile-metanol (1:1, v/v)                           |

|                                   |              |                                                                                                                                                                            |                                                       |                                                           |  |
|-----------------------------------|--------------|----------------------------------------------------------------------------------------------------------------------------------------------------------------------------|-------------------------------------------------------|-----------------------------------------------------------|--|
|                                   | 15307-86-5   | C <sub>14</sub> H <sub>11</sub> Cl <sub>2</sub> NO <sub>2</sub>                                                                                                            |                                                       |                                                           |  |
| <b>Didemethylcitalopram</b>       | 1189694-81-2 | C <sub>18</sub> H <sub>18</sub> ClFN <sub>2</sub> O ( <b>Didemethylcitalopram hydrochloride</b> ) (MW= 332.803 g/mol)                                                      | H. Lundbeck (Copenhagen, Denmark)                     | Methanol                                                  |  |
|                                   | 62498-69-5   | C <sub>18</sub> H <sub>17</sub> FN <sub>2</sub> O (MW= 296.3 g/mol)                                                                                                        |                                                       |                                                           |  |
| <b>Diltiazem</b>                  | 33286-22-5   | C <sub>22</sub> H <sub>27</sub> ClN <sub>2</sub> O <sub>4</sub> S ( <b>Diltiazem hydrochloride</b> ) (MW= 450.978 g/mol)                                                   | Sigma-Aldrich (Madrid, Spain)                         | Methanol                                                  |  |
|                                   | 42399-41-7   | C <sub>22</sub> H <sub>26</sub> N <sub>2</sub> O <sub>4</sub> S (MW= 414.5 g/mol)                                                                                          |                                                       |                                                           |  |
| <b>Doxycycline</b>                | 24390-14-5   | C <sub>22</sub> H <sub>24</sub> N <sub>2</sub> O <sub>8</sub> HCl 0.5H <sub>2</sub> O 0.5C <sub>2</sub> H <sub>6</sub> O ( <b>Doxycycline hyclate</b> ) (MW= 512.94 g/mol) | Sigma-Aldrich (Madrid, Spain)                         | Acetonitrile-metanol (1:1, v/v)                           |  |
|                                   | 564-25-0     | C <sub>22</sub> H <sub>24</sub> N <sub>2</sub> O <sub>8</sub> (MW= 444.44 g/mol)                                                                                           |                                                       |                                                           |  |
| <b>Enrofloxacin</b>               | 93106-60-6   | C <sub>19</sub> H <sub>22</sub> FN <sub>3</sub> O <sub>3</sub> (MW= 359.401 g/mol)                                                                                         | Sigma-Aldrich (Madrid, Spain)                         | Milli-Q Water-10% acetic acid in Milli-Q water (1:1, v/v) |  |
| <b>(+)-Ephedrine</b>              | 134-71-4     | C <sub>10</sub> H <sub>16</sub> CINO ( <b>(+)-Ephedrine hydrochloride</b> ) (MW= 201.694 g/mol)                                                                            | Lipomed AG (Arlesheim, Switzerland)                   | Methanol                                                  |  |
|                                   | 134-72-5     | C <sub>10</sub> H <sub>15</sub> NO (MW= 165.236 g/mol)                                                                                                                     |                                                       |                                                           |  |
| <b>10,11-Epoxy carbamazepine</b>  | 36507-30-9   | C <sub>15</sub> H <sub>12</sub> N <sub>2</sub> O <sub>2</sub> (MW= 252.273 g/mol)                                                                                          | Sigma-Aldrich (Madrid, Spain)                         | Methanol                                                  |  |
| <b>Erythromycin</b>               | 643-22-1     | C <sub>37</sub> H <sub>67</sub> NO <sub>13</sub> (MW= 733.937 g/mol)                                                                                                       | Sigma-Aldrich (Madrid, Spain)                         | Methanol                                                  |  |
| <b>Fenfluramine</b>               | 404-82-0     | C <sub>12</sub> H <sub>17</sub> ClF <sub>3</sub> N ( <b>Fenfluramine hydrochloride</b> ) (MW= 267.72 g/mol)                                                                | LGC (Middlesex, UK)                                   | Methanol                                                  |  |
|                                   | 404-82-0     | C <sub>12</sub> H <sub>16</sub> F <sub>3</sub> N (MW= 231.262 g/mol)                                                                                                       |                                                       |                                                           |  |
| <b>Fenofibrate</b>                | 49562-28-9   | C <sub>20</sub> H <sub>21</sub> ClO <sub>4</sub> (MW= 360.834 g/mol)                                                                                                       | Sigma-Aldrich (Madrid, Spain)                         |                                                           |  |
| <b>Fluoxetine</b>                 | 56296-78-7   | C <sub>17</sub> H <sub>19</sub> ClF <sub>3</sub> NO ( <b>Fluoxetine hydrochloride</b> ) (MW= 345.79 g/mol)                                                                 | Sigma-Aldrich (Madrid, Spain)                         | Methanol                                                  |  |
|                                   | 54910-89-3   | C <sub>17</sub> H <sub>18</sub> F <sub>3</sub> NO (MW= 309.332 g/mol)                                                                                                      |                                                       |                                                           |  |
| <b>Gemfibrozil</b>                | 25812-30-0   | C <sub>15</sub> H <sub>22</sub> O <sub>3</sub> (MW= 250.338 g/mol)                                                                                                         | Sigma-Aldrich (Madrid, Spain)                         | Methanol                                                  |  |
| <b>2-Hydroxyibuprofen</b>         | 51146-55-5   | C <sub>13</sub> H <sub>18</sub> O <sub>3</sub> (MW= 222.284 g/mol)                                                                                                         | Sigma-Aldrich (Madrid, Spain)                         | Acetonitrile                                              |  |
| <b>Ibuprofen</b>                  | 15687-27-1   | C <sub>13</sub> H <sub>18</sub> O <sub>2</sub> (MW= 206.285 g/mol)                                                                                                         | Sigma-Aldrich (Madrid, Spain)                         | Acetonitrile                                              |  |
| <b>Ketoprofen</b>                 | 22071-15-4   | C <sub>16</sub> H <sub>14</sub> O <sub>3</sub> (MW= 254.285 g/mol)                                                                                                         | Sigma-Aldrich (Madrid, Spain)                         | Acetonitrile                                              |  |
| <b>Lansoprazole</b>               | 103577-45-3  | C <sub>16</sub> H <sub>14</sub> F <sub>3</sub> N <sub>3</sub> O <sub>2</sub> S (MW= 369.362 g/mol)                                                                         | Sigma-Aldrich (Madrid, Spain)                         | Methanol                                                  |  |
| <b>Lomefloxacin hydrochloride</b> | 8079-52-8    | C <sub>17</sub> H <sub>20</sub> ClF <sub>2</sub> N <sub>3</sub> O <sub>3</sub> (MW= 387.812 g/mol)                                                                         | Sigma-Aldrich (Madrid, Spain)                         | Milli-Q Water-10% acetic acid in Milli-Q water (1:1, v/v) |  |
| <b>Lomefloxacin</b>               | 98079-51-7   | C <sub>17</sub> H <sub>19</sub> F <sub>2</sub> N <sub>3</sub> O <sub>3</sub> (MW= 351.354 g/mol)                                                                           |                                                       |                                                           |  |
| <b>Lorazepam</b>                  | 846-49-1     | C <sub>15</sub> H <sub>10</sub> Cl <sub>2</sub> N <sub>2</sub> O <sub>2</sub> (MW= 321.157 g/mol)                                                                          | Lipomed AG (Arlesheim, Switzerland)                   | Methanol                                                  |  |
| <b>Mazindol</b>                   | 22232-71-9   | C <sub>16</sub> H <sub>13</sub> CIN <sub>2</sub> O (MW= 284.743 g/mol)                                                                                                     | Lipomed AG (Arlesheim, Switzerland)                   | Methanol                                                  |  |
| <b>Metformin</b>                  | 1115-70-4    | C <sub>4</sub> H <sub>12</sub> ClN <sub>5</sub> ( <b>Metformin hydrochloride</b> ) (MW= 165.625 g/mol)                                                                     | Sigma-Aldrich (Madrid, Spain)                         | Methanol                                                  |  |
|                                   | 657-24-9     | C <sub>4</sub> H <sub>11</sub> N <sub>5</sub> (MW= 129.167 g/mol)                                                                                                          |                                                       |                                                           |  |
| <b>d,l-Methamphetamine</b>        | 300-42-5     | C <sub>10</sub> H <sub>16</sub> CIN ( <b>d,l-Methamphetamine hydrochloride</b> ) (MW= 185.70 g/mol)                                                                        | Lipomed AG (Arlesheim, Switzerland)                   | Methanol                                                  |  |
|                                   | 7632-10-2    | C <sub>10</sub> H <sub>15</sub> N (MW= 149.237 g/mol)                                                                                                                      |                                                       |                                                           |  |
| <b>Moxifloxacin</b>               | 186826-86-8  | C <sub>21</sub> H <sub>26</sub> ClFN <sub>3</sub> O <sub>4</sub> ( <b>Moxifloxacin hydrochloride</b> ) (MW= 437.896 g/mol)                                                 | Sigma-Aldrich (Madrid, Spain)                         | Milli-Q Water-10% acetic acid in Milli-Q water (1:1, v/v) |  |
|                                   | 151096-09-2  | C <sub>21</sub> H <sub>24</sub> FN <sub>3</sub> O <sub>4</sub> (MW= 401.438 g/mol)                                                                                         |                                                       |                                                           |  |
| <b>Naproxen</b>                   | 22204-53-1   | C <sub>14</sub> H <sub>14</sub> O <sub>3</sub> (MW= 230.263 g/mol)                                                                                                         | Sigma-Aldrich (Madrid, Spain)                         | Acetonitrile-metanol (1:1,v/v)                            |  |
| <b>Nimesulide</b>                 | 51803-78-2   | C <sub>13</sub> H <sub>12</sub> N <sub>2</sub> O <sub>5</sub> S (MW= 308.308 g/mol)                                                                                        | Sigma-Aldrich (Madrid, Spain)                         | Acetonitrile                                              |  |
| <b>d,l-Norephedrine</b>           | 154-41-6     | C <sub>9</sub> H <sub>14</sub> CINO ( <b>d,l-Norephedrine hydrochloride</b> ) (MW= 187.667 g/mol)                                                                          | Lipomed AG (Arlesheim, Switzerland)                   | Methanol                                                  |  |
|                                   | 37577-28-9   | C <sub>9</sub> H <sub>13</sub> NO (MW= 151.209 g/mol)                                                                                                                      |                                                       |                                                           |  |
| <b>Norfloxacin</b>                | 70458-96-7   | C <sub>16</sub> H <sub>18</sub> FN <sub>3</sub> O <sub>3</sub> (MW= 319.33 g/mol)                                                                                          | Sigma-Aldrich (Madrid, Spain)                         | Milli-Q Water-10% acetic acid in Milli-Q water (1:1, v/v) |  |
| <b>Norfluooxetine</b>             | 57226-68-3   | C <sub>16</sub> H <sub>17</sub> ClF <sub>3</sub> NO ( <b>Norfluooxetine hydrochloride</b> ) (MW= 331.763 g/mol)                                                            | Sigma-Aldrich (Madrid, Spain)                         | Methanol                                                  |  |
|                                   | 83891-03-6   | C <sub>16</sub> H <sub>16</sub> F <sub>3</sub> NO (MW= 295.305 g/mol)                                                                                                      |                                                       |                                                           |  |
| <b>Norsertaline</b>               | 675126-08-6  | C <sub>16</sub> H <sub>16</sub> Cl <sub>3</sub> N ( <b>Norsertaline hydrochloride</b> ) (MW= 328.661 g/mol)                                                                | Cerilliant-Certified Reference Materials (Texas, USA) | Purchased as methanolic solution                          |  |
|                                   | 87857-41-8   | C <sub>16</sub> H <sub>15</sub> Cl <sub>2</sub> N (MW= 292.203 g/mol)                                                                                                      |                                                       |                                                           |  |
| <b>O-Desmethylvenlafaxine</b>     | 93413-62-8   | C <sub>16</sub> H <sub>25</sub> NO <sub>2</sub> (MW= 263.381 g/mol)                                                                                                        | Sigma-Aldrich (Madrid, Spain)                         | Purchased as methanolic solution                          |  |
| <b>Ofloxacin</b>                  | 82419-36-1   | C <sub>18</sub> H <sub>20</sub> FN <sub>3</sub> O <sub>4</sub> (MW= 361.373 g/mol)                                                                                         | Sigma-Aldrich (Madrid, Spain)                         | Milli-Q Water-10% acetic acid in Milli-Q water (1:1, v/v) |  |
| <b>Oxytetracycline</b>            | 2058-46-0    | C <sub>22</sub> H <sub>25</sub> CIN <sub>2</sub> O <sub>9</sub> ( <b>Oxytetracycline hydrochloride</b> ) (MW= 496.897 g/mol)                                               | Sigma-Aldrich (Madrid, Spain)                         | Acetonitrile-metanol (1:1, v/v)                           |  |

|                                             |              |                                                                                                                                       |                                                       |                                                           |
|---------------------------------------------|--------------|---------------------------------------------------------------------------------------------------------------------------------------|-------------------------------------------------------|-----------------------------------------------------------|
|                                             | 2058-46-0    | C <sub>22</sub> H <sub>24</sub> N <sub>2</sub> O <sub>9</sub> (MW= 460.439 g/mol)                                                     |                                                       |                                                           |
| Paroxetine                                  | 78246-49-8   | C <sub>19</sub> H <sub>21</sub> ClFNO <sub>3</sub> ( <b>Paroxetine hydrochloride</b> ) (MW= 365.829 g/mol)                            | Sigma-Aldrich (Madrid, Spain)                         | Methanol                                                  |
|                                             | 110429-35-1  | C <sub>19</sub> H <sub>20</sub> FNO <sub>3</sub> (MW= 329.371 g/mol)                                                                  |                                                       |                                                           |
| Phenolphthalein                             | 77-09-8      | C <sub>20</sub> H <sub>14</sub> O <sub>4</sub> (MW= 318.328 g/mol)                                                                    | Sigma-Aldrich (Madrid, Spain)                         | Methanol                                                  |
| Phentermine                                 | 1197-21-3    | C <sub>10</sub> H <sub>16</sub> CIN ( <b>Phentermine hydrochloride</b> ) (MW= 185.695 g/mol)                                          | Lipomed AG (Arlesheim, Switzerland)                   | Methanol                                                  |
|                                             | 122-09-8     | C <sub>10</sub> H <sub>15</sub> N (MW= 149.237 g/mol)                                                                                 |                                                       |                                                           |
| Pravastatin                                 | 81131-70-6   | C <sub>23</sub> H <sub>36</sub> NaO <sub>7</sub> ( <b>Pravastatin sodium salt hydrate</b> ) (MW= 446.516 g/mol)                       | Sigma-Aldrich (Madrid, Spain)                         | Methanol                                                  |
|                                             | 81093-37-0   | C <sub>23</sub> H <sub>36</sub> O <sub>7</sub> (MW= 424.534 g/mol)                                                                    |                                                       |                                                           |
| Propranolol                                 | 318-98-9     | C <sub>16</sub> H <sub>22</sub> ClNO <sub>2</sub> ( <b>Propranolol hydrochloride</b> ) (MW= 295.807 g/mol)                            | Sigma-Aldrich (Madrid, Spain)                         | Methanol                                                  |
|                                             | 525-66-6     | C <sub>16</sub> H <sub>21</sub> NO <sub>2</sub> (MW= 259.349 g/mol)                                                                   |                                                       |                                                           |
| Prulifloxacin                               | 123447-62-1  | C <sub>21</sub> H <sub>26</sub> FN <sub>3</sub> O <sub>6</sub> S (MW= 461.464 g/mol)                                                  | Toronto Research Chemicals Inc. (Ontario, Canada)     | Milli-Q Water-10% acetic acid in Milli-Q water (1:1, v/v) |
| Rimionabant                                 | 168273-06-1  | C <sub>22</sub> H <sub>21</sub> Cl <sub>3</sub> N <sub>4</sub> O (MW= 463.787 g/mol)                                                  | LGC (Middlesex, UK)                                   | Methanol                                                  |
| Salicylic acid                              | 69-72-7      | C <sub>7</sub> H <sub>6</sub> O <sub>3</sub> (MW= 138.122 g/mol)                                                                      | Sigma-Aldrich (Madrid, Spain)                         | Acetonitrile                                              |
| Sertraline                                  | 79559-97-0   | C <sub>17</sub> H <sub>18</sub> Cl <sub>3</sub> N ( <b>Sertraline hydrochloride</b> ) (MW= 342.688 g/mol)                             | Sigma-Aldrich (Madrid, Spain)                         | Methanol                                                  |
|                                             | 79617-96-2   | C <sub>17</sub> H <sub>17</sub> Cl <sub>2</sub> N (MW= 306.23 g/mol)                                                                  |                                                       |                                                           |
| Sibutramine                                 | 84485-00-7   | C <sub>17</sub> H <sub>27</sub> Cl <sub>2</sub> N ( <b>Sibutramine hydrochloride</b> ) (MW= 316.31 g/mol)                             | LGC (Middlesex, UK)                                   | Purchased as methanolic solution                          |
|                                             | 106650-56-0  | C <sub>17</sub> H <sub>26</sub> CIN (MW= 279.852 g/mol)                                                                               |                                                       |                                                           |
| Simvastatin                                 | 79902-63-9   | C <sub>28</sub> H <sub>38</sub> O <sub>5</sub> (MW= 418.574 g/mol)                                                                    | Sigma-Aldrich (Madrid, Spain)                         | Methanol                                                  |
| Sulfadiazine                                | 68-35-9      | C <sub>10</sub> H <sub>10</sub> N <sub>4</sub> O <sub>2</sub> S (MW= 250.276 g/mol)                                                   | Sigma-Aldrich (Madrid, Spain)                         | Methanol                                                  |
| Sulfadimethoxine                            | 122-11-2     | C <sub>12</sub> H <sub>14</sub> N <sub>4</sub> O <sub>4</sub> S (MW= 310.328 g/mol)                                                   | Sigma-Aldrich (Madrid, Spain)                         | Methanol                                                  |
| Sulfamethazine                              | 57-68-1      | C <sub>12</sub> H <sub>14</sub> N <sub>4</sub> O <sub>2</sub> S (MW= 278.33 g/mol)                                                    | Sigma-Aldrich (Madrid, Spain)                         | Methanol                                                  |
| Sulfamethizole                              | 144-82-1     | C <sub>9</sub> H <sub>10</sub> N <sub>4</sub> O <sub>2</sub> S <sub>2</sub> (MW= 270.325 g/mol)                                       | Sigma-Aldrich (Madrid, Spain)                         | Acetonitrile-metanol (1:1, v/v)                           |
| Sulfamethoxazole                            | 723-46-6     | C <sub>10</sub> H <sub>11</sub> N <sub>3</sub> O <sub>3</sub> S (MW= 253.276 g/mol)                                                   | Sigma-Aldrich (Madrid, Spain)                         | Methanol                                                  |
| Sulfamethoxypyridazine                      | 80-35-3      | C <sub>11</sub> H <sub>12</sub> N <sub>4</sub> O <sub>3</sub> S (MW= 280.302 g/mol)                                                   | Sigma-Aldrich (Madrid, Spain)                         | Methanol                                                  |
| Sulfapyridine                               | 144-83-2     | C <sub>11</sub> H <sub>11</sub> N <sub>3</sub> O <sub>2</sub> S (MW= 249.288 g/mol)                                                   | Sigma-Aldrich (Madrid, Spain)                         | Methanol                                                  |
| Sulfaquinoxaline                            | 59-40-5      | C <sub>14</sub> H <sub>12</sub> N <sub>4</sub> O <sub>2</sub> S (MW= 300.336 g/mol)                                                   | Sigma-Aldrich (Madrid, Spain)                         | Methanol                                                  |
| Sulfathiazole                               | 144-74-1     | C <sub>9</sub> H <sub>8</sub> N <sub>3</sub> NaO <sub>2</sub> S <sub>2</sub> ( <b>Sulfathiazole sodium salt</b> ) (MW= 277.292 g/mol) | Sigma-Aldrich (Madrid, Spain)                         | Acetonitrile-metanol (1:1, v/v)                           |
|                                             | 72-14-0      | C <sub>9</sub> H <sub>8</sub> N <sub>3</sub> O <sub>2</sub> S <sub>2</sub> (MW= 255.31 g/mol)                                         |                                                       |                                                           |
| Synephrine                                  | 94-07-5      | C <sub>9</sub> H <sub>13</sub> NO <sub>2</sub> (MW= 167.208 g/mol)                                                                    | LGC (Middlesex, UK)                                   | Methanol                                                  |
| Tetracycline                                | 64-75-5      | C <sub>22</sub> H <sub>26</sub> ClN <sub>2</sub> O <sub>8</sub> ( <b>Tetracycline hydrochloride</b> ) (MW=480.898 g/mol)              | Sigma-Aldrich (Madrid, Spain)                         | Acetonitrile-metanol (1:1, v/v)                           |
|                                             | 64-75-5      | C <sub>22</sub> H <sub>24</sub> N <sub>2</sub> O <sub>8</sub> (MW= 444.44 g/mol)                                                      |                                                       |                                                           |
| Topiramate                                  | 97240-79-4   | C <sub>12</sub> H <sub>21</sub> NO <sub>8</sub> S (MW= 339.359 g/mol)                                                                 | Lipomed AG (Arlesheim, Switzerland)                   | Methanol                                                  |
| Trazodone                                   | 19666-36-5   | C <sub>19</sub> H <sub>23</sub> Cl <sub>2</sub> N <sub>5</sub> O ( <b>Trazodone hydrochloride</b> ) (MW= 408.327 g/mol)               | Sigma-Aldrich (Madrid, Spain)                         | Methanol                                                  |
|                                             | 19794-93-5   | C <sub>19</sub> H <sub>22</sub> ClN <sub>5</sub> O (MW= 371.869 g/mol)                                                                |                                                       |                                                           |
| Trimethoprim                                | 738-70-5     | C <sub>14</sub> H <sub>18</sub> N <sub>4</sub> O <sub>3</sub> (MW= 290.323 g/mol)                                                     | Sigma-Aldrich (Madrid, Spain)                         | Methanol                                                  |
| Venlafaxine                                 | 99300-78-4   | C <sub>17</sub> H <sub>28</sub> ClNO <sub>2</sub> ( <b>Venlafaxine hydrochloride</b> ) (MW= 313.866 g/mol)                            | Sigma-Aldrich (Madrid, Spain)                         | Methanol                                                  |
|                                             | 93413-69-5   | C <sub>17</sub> H <sub>27</sub> NO <sub>2</sub> (MW= 277.408 g/mol)                                                                   |                                                       |                                                           |
| Zonisamide                                  | 68291-97-4   | C <sub>8</sub> H <sub>8</sub> N <sub>2</sub> O <sub>3</sub> S (MW= 212.223 g/mol)                                                     | LGC (Middlesex, UK)                                   | Methanol                                                  |
| ILIS, Acetaminophen-d4                      | 64315-36-2   | C <sub>8</sub> H <sub>5</sub> D <sub>4</sub> NO <sub>2</sub> (MW= 155.189 g/mol)                                                      | Toronto Research Chemicals Inc. (Ontario, Canada)     | Acetonitrile                                              |
| ILIS, Atenolol-d7                           | 1202864-50-3 | C <sub>14</sub> H <sub>15</sub> D <sub>7</sub> N <sub>2</sub> O <sub>3</sub> (MW= 273.384 g/mol)                                      | Sigma-Aldrich (Madrid, Spain)                         | Methanol                                                  |
| ILIS, Azithromycin-d3                       | 163921-65-1  | C <sub>38</sub> H <sub>69</sub> D <sub>3</sub> N <sub>2</sub> O <sub>12</sub> (MW= 752.014 g/mol)                                     | Toronto Research Chemicals Inc. (Ontario, Canada)     | Methanol                                                  |
| ILIS, Caffeine <sup>13</sup> C <sub>3</sub> | 78072-66-9   | <sup>13</sup> C <sub>3</sub> C <sub>5</sub> H <sub>10</sub> N <sub>4</sub> O <sub>2</sub> (MW= 197.17 g/mol)                          | Sigma-Aldrich (Madrid, Spain)                         | Purchased as methanolic solution                          |
| ILIS, Carbamazepine-d10                     | 132183-78-9  | C <sub>15</sub> H <sub>2</sub> D <sub>10</sub> N <sub>2</sub> O (MW= 246.33 g/mol)                                                    | Cerilliant-Certified Reference Materials (Texas, USA) | Purchased as methanolic solution                          |
| ILIS, Ciprofloxacin-d8 hydrochloride        | 1216659-54-9 | C <sub>17</sub> H <sub>11</sub> D <sub>8</sub> ClFN <sub>3</sub> O <sub>3</sub> (MW= 375.85 g/mol)                                    | Toronto Research Chemicals Inc. (Ontario, Canada)     | Milli-Q Water-10% acetic acid in Milli-Q water (1:1, v/v) |

|                                                     |              |                                                                                                 |                                                       |                                  |
|-----------------------------------------------------|--------------|-------------------------------------------------------------------------------------------------|-------------------------------------------------------|----------------------------------|
| <b>ILIS</b> , d,l-Methamphetamine-d5 hydrochloride  | 60124-88-1   | C <sub>10</sub> H <sub>11</sub> ClD <sub>5</sub> N (MW= 190.74 g/mol)                           | Lipomed AG (Arlesheim, Switzerland)                   | Methanol                         |
| <b>ILIS</b> , Diazepam-d5                           | 65854-76-4   | C <sub>16</sub> H <sub>8</sub> D <sub>5</sub> ClN <sub>2</sub> O (MW= 289.77 g/mol)             | Lipomed AG (Arlesheim, Switzerland)                   | Purchased as methanolic solution |
| <b>ILIS</b> , Fluoxetine-d5 hydrochloride           | 1173020-43-3 | C <sub>17</sub> H <sub>14</sub> D <sub>5</sub> ClF <sub>3</sub> NO (MW= 350.821 g/mol)          | Sigma-Aldrich (Madrid, Spain)                         | Methanol                         |
| <b>ILIS</b> , Gemfibrozil-d6                        | 1184986-45-5 | C <sub>8</sub> H <sub>5</sub> D <sub>4</sub> NO <sub>2</sub> (MW= 256.37 g/mol)                 | Toronto Research Chemicals Inc. (Ontario, Canada)     | Methanol                         |
| <b>ILIS</b> , Ibuprofen-d3                          | 121662-14-4  | C <sub>13</sub> H <sub>18</sub> D <sub>3</sub> O <sub>2</sub> (MW= 209.30 g/mol)                | Sigma-Aldrich (Madrid, Spain)                         | Acetonitrile                     |
| <b>ILIS</b> , Metformin-(dimethyl-d6) hydrochloride | 1185166-01-1 | C <sub>4</sub> D <sub>6</sub> H <sub>6</sub> ClN <sub>5</sub> (MW= 171.66 g/mol)                | Sigma-Aldrich (Madrid, Spain)                         | Methanol                         |
| <b>ILIS</b> , Propranolol-d7                        | 344298-99-3  | C <sub>16</sub> H <sub>21</sub> D <sub>7</sub> NO <sub>2</sub> (MW= 266.39 g/mol)               | LGC (Middlesex, UK)                                   | Methanol                         |
| <b>ILIS</b> , Salicylic acid-d4                     | 97781-16-3   | C <sub>9</sub> H <sub>4</sub> D <sub>4</sub> O <sub>4</sub> (MW= 184.18 g/mol)                  | Toronto Research Chemicals Inc. (Ontario, Canada)     | Acetonitrile                     |
| <b>ILIS</b> , Sulfamethoxazole-d4                   | 1020719-86-1 | C <sub>10</sub> H <sub>7</sub> D <sub>4</sub> N <sub>3</sub> O <sub>3</sub> S (MW= 257.3 g/mol) | Toronto Research Chemicals Inc. (Ontario, Canada)     | Methanol                         |
| <b>ILIS</b> , Topiramate-d12                        | 1279037-95-4 | C <sub>12</sub> H <sub>5</sub> D <sub>12</sub> NO <sub>6</sub> S (MW= 351.44 g/mol)             | LGC (Middlesex, UK)                                   | Purchased as methanolic solution |
| <b>ILIS</b> , Venlafaxine-d6                        | 1062606-12-5 | C <sub>17</sub> H <sub>22</sub> ClD <sub>6</sub> NO <sub>2</sub> (MW= 319.90 g/mol)             | Cerilliant-Certified Reference Materials (Texas, USA) | Purchased as methanolic solution |

\* for the compound Citalopram propionic acid, the information of CAS is not available.

**Note 1:** Pharmaceuticals organized in the table by alphabetic order. **Note 2:** Chemical Abstracts Service, CAS (a unique numerical identifier assigned by the Chemical Abstracts Service to every chemical substance described in the open scientific literature).

**Note 3:** CAS, formula, and molecular weight for all the compounds were obtained in the web site of PubChem (PubChem is an open chemistry database at the National Institutes of Health (NIH) [Available at: <https://pubchem.ncbi.nlm.nih.gov/>], with exception for citalopram propionic acid [Available at: <http://www.hmdb.ca/metabolites/HMDB60463>].

**Table S2.** Pesticides, transformation products, isotopically labelled internal standards (ILIS), chemical abstracts service (CAS), formula, molecular weight, supplier company, and solvent used for the preparation of each stock solution.

| Pesticides, transformation products, and isotopically<br>Labelled Internal Standard (ILIS) <sup>Note 1</sup> | CAS <sup>Note 2,3</sup> | Formula (Molecular Weight) <sup>Note 3</sup>                                                     | Supplier Company                  | Solvent used for the preparation<br>of each stock solution |
|--------------------------------------------------------------------------------------------------------------|-------------------------|--------------------------------------------------------------------------------------------------|-----------------------------------|------------------------------------------------------------|
| Alachlor                                                                                                     | 15972-60-8              | C <sub>14</sub> H <sub>20</sub> ClNO <sub>2</sub> (MW= 269.8 g/mol)                              | Riedel-de-Haën™ (Seelze, Germany) | Methanol                                                   |
| Ametryn                                                                                                      | 384-12-8                | C <sub>9</sub> H <sub>11</sub> N <sub>5</sub> S (MW= 227.12 g/mol)                               | Riedel-de-Haën™ (Seelze, Germany) | Methanol                                                   |
| Asulam                                                                                                       | 3337-71-1               | C <sub>8</sub> H <sub>10</sub> N <sub>2</sub> O <sub>4</sub> S (MW= 230.2 g/mol)                 | Riedel-de-Haën™ (Seelze, Germany) | Acetonitrile                                               |
| Atrazine                                                                                                     | 1912-24-9               | C <sub>8</sub> H <sub>14</sub> ClN <sub>5</sub> (MW= 175.8 g/mol)                                | Riedel-de-Haën™ (Seelze, Germany) | Methanol                                                   |
| Atrazine-desethyl                                                                                            | 6190-65-4               | C <sub>8</sub> H <sub>10</sub> ClN <sub>5</sub> (MW= 187.63 g/mol)                               | Riedel-de-Haën™ (Seelze, Germany) | Acetonitrile                                               |
| Atrazine-desisopropyl                                                                                        | 1007-28-9               | C <sub>8</sub> H <sub>8</sub> ClN <sub>5</sub> (MW= 173.6 g/mol)                                 | Riedel-de-Haën™ (Seelze, Germany) | Acetonitrile                                               |
| Azinphos-methyl                                                                                              | 86-50-0                 | C <sub>10</sub> H <sub>12</sub> N <sub>3</sub> O <sub>3</sub> PS <sub>2</sub> (MW= 317.32 g/mol) | Riedel-de-Haën™ (Seelze, Germany) | Acetonitrile                                               |
| Azoxystrobin                                                                                                 | 131860-33-8             | C <sub>22</sub> H <sub>17</sub> N <sub>3</sub> O <sub>5</sub> (MW= 403.4 g/mol)                  | Riedel-de-Haën™ (Seelze, Germany) | Acetonitrile                                               |
| Bensulfuron-methyl                                                                                           | 83055-99-6              | C <sub>16</sub> H <sub>18</sub> N <sub>4</sub> O <sub>7</sub> S (MW= 410.4 g/mol)                | Riedel-de-Haën™ (Seelze, Germany) | Methanol                                                   |
| Bentazone                                                                                                    | 25057-89-0              | C <sub>10</sub> H <sub>12</sub> N <sub>2</sub> O <sub>3</sub> S (MW= 240.3 g/mol)                | Riedel-de-Haën™ (Seelze, Germany) | Methanol                                                   |
| Carbaryl                                                                                                     | 63-25-2                 | C <sub>12</sub> H <sub>11</sub> NO <sub>2</sub> (MW= 201.2 g/mol)                                | Riedel-de-Haën™ (Seelze, Germany) | Acetonitrile                                               |
| Carbofuran                                                                                                   | 1563-66-2               | C <sub>12</sub> H <sub>15</sub> NO <sub>3</sub> (MW= 221.3 g/mol)                                | Riedel-de-Haën™ (Seelze, Germany) | Acetonitrile                                               |
| Chlorfenvinphos                                                                                              | 470-90-6                | C <sub>12</sub> H <sub>14</sub> Cl <sub>2</sub> O <sub>4</sub> P (MW= 359.6 g/mol)               | Riedel-de-Haën™ (Seelze, Germany) | Acetonitrile                                               |
| Chlortoluron                                                                                                 | 15545-48-9              | C <sub>10</sub> H <sub>13</sub> ClN <sub>2</sub> O (MW= 212.7 g/mol)                             | Riedel-de-Haën™ (Seelze, Germany) | Acetonitrile                                               |
| Chlorpropham                                                                                                 | 101-21-3                | C <sub>10</sub> H <sub>12</sub> ClNO (MW= 213.7 g/mol)                                           | Riedel-de-Haën™ (Seelze, Germany) | Acetonitrile                                               |
| Dimethoate                                                                                                   | 60-51-5                 | C <sub>5</sub> H <sub>12</sub> NO <sub>3</sub> PS <sub>2</sub> (MW= 229.3 g/mol)                 | Fluka™ (Seelze, Germany)          | Methanol                                                   |
| Diuron                                                                                                       | 330-54-1                | C <sub>9</sub> H <sub>10</sub> Cl <sub>2</sub> N <sub>2</sub> O (MW= 233.1 g/mol)                | Riedel-de-Haën™ (Seelze, Germany) | Methanol                                                   |
| Imidacloprid                                                                                                 | 138261-41-3             | C <sub>9</sub> H <sub>10</sub> ClN <sub>3</sub> O <sub>2</sub> (MW= 255.7 g/mol)                 | Sigma Aldrich (Madrid, Spain)     | Acetonitrile                                               |
| Isoproturon                                                                                                  | 34123-59-6              | C <sub>12</sub> H <sub>18</sub> N <sub>2</sub> O (MW= 206.3 g/mol)                               | Riedel-de-Haën™ (Seelze, Germany) | Methanol                                                   |
| Linuron                                                                                                      | 330-55-2                | C <sub>8</sub> H <sub>10</sub> Cl <sub>2</sub> N <sub>2</sub> O <sub>2</sub> (MW= 249.1 g/mol)   | Riedel-de-Haën™ (Seelze, Germany) | Acetonitrile                                               |
| Malathion                                                                                                    | 121-75-5                | C <sub>10</sub> H <sub>19</sub> O <sub>6</sub> PS <sub>2</sub> (MW= 330.3 g/mol)                 | Riedel-de-Haën™ (Seelze, Germany) | Methanol                                                   |
| Metalaxyl                                                                                                    | 57837-19-1              | C <sub>15</sub> H <sub>21</sub> NO <sub>4</sub> (MW= 379.3 g/mol)                                | Riedel-de-Haën™ (Seelze, Germany) | Acetonitrile                                               |
| Metolachlor                                                                                                  | 51218-45-2              | C <sub>15</sub> H <sub>22</sub> ClNO <sub>2</sub> (MW= 283.79 g/mol)                             | Riedel-de-Haën™ (Seelze, Germany) | Methanol                                                   |
| Methiocarb                                                                                                   | 2032-65-7               | C <sub>11</sub> H <sub>15</sub> NO <sub>2</sub> S (MW= 225.3 g/mol)                              | Fluka™ (Seelze, Germany)          | Methanol                                                   |
| Methiocarb sulfone                                                                                           | 2179-25-1               | C <sub>11</sub> H <sub>15</sub> NO <sub>4</sub> S (MW= 257.3 g/mol)                              | Fluka™ (Seelze, Germany)          | Methanol                                                   |
| Methiocarb sulfoxide                                                                                         | 2635-10-1               | C <sub>11</sub> H <sub>15</sub> NO <sub>3</sub> S (MW= 241.3 g/mol)                              | Fluka (Seelze, Germany)           | Methanol                                                   |
| Metobromuron                                                                                                 | 3060-89-7               | C <sub>8</sub> H <sub>11</sub> BrN <sub>2</sub> O <sub>2</sub> (MW= 259.1 g/mol)                 | Riedel-de-Haën™ (Seelze, Germany) | Acetonitrile                                               |
| Monolinuron                                                                                                  | 1746-81-2               | C <sub>9</sub> H <sub>11</sub> ClN <sub>2</sub> O <sub>2</sub> (MW= 214.6 g/mol)                 | Riedel-de-Haën™ (Seelze, Germany) | Acetonitrile                                               |
| Pirimicarb                                                                                                   | 23103-28-2              | C <sub>11</sub> H <sub>18</sub> NaO <sub>2</sub> (MW= 238.3 g/mol)                               | Fluka™ (Seelze, Germany)          | Acetonitrile                                               |
| Propoxur                                                                                                     | 114-26-1                | C <sub>11</sub> H <sub>15</sub> NO <sub>3</sub> (MW= 209.2 g/mol)                                | Riedel-de-Haën™ (Seelze, Germany) | Acetonitrile                                               |
| Pyrimethanil                                                                                                 | 53112-28-0              | C <sub>12</sub> H <sub>13</sub> N <sub>3</sub> (MW= 199.3 g/mol)                                 | Fluka™ (Seelze, Germany)          | Methanol                                                   |
| Terbuthylazine                                                                                               | 5915-41-3               | C <sub>9</sub> H <sub>16</sub> ClN <sub>5</sub> (MW= 229.7 g/mol)                                | Sigma Aldrich (Madrid, Spain)     | Acetonitrile                                               |
| Thiobencarb                                                                                                  | 28249-77-6              | C <sub>12</sub> H <sub>16</sub> ClNOS (MW= 257.8 g/mol)                                          | Riedel-de-Haën™ (Seelze, Germany) | Methanol                                                   |
| ILIS, Diuron-d6                                                                                              | 1007536-67-5            | C <sub>9</sub> H <sub>4</sub> D <sub>6</sub> Cl <sub>2</sub> N <sub>2</sub> O (MW= 239.13 g/mol) | Sigma Aldrich (Madrid, Spain)     | Methanol                                                   |

**Note 1:** Pesticides organized in the table by alphabetic order. **Note 2:** Chemical Abstracts Service, CAS (a unique numerical identifier assigned by the Chemical Abstracts Service to every chemical substance described in the open scientific literature). **Note 3:** CAS, formula, and molecular weight for all the compounds were obtained in the web site of PubChem (PubChem is an open chemistry database at the National Institutes of Health (NIH) [Available at: <https://pubchem.ncbi.nlm.nih.gov/>].

**Table S3.** Concentration in the standards and in the analysed samples of the fifteen isotopically labelled internal standards (ILIS).

| Isotopically Labelled Internal Standards (ILIS) <sup>Note 1</sup> | Final concentration<br>(µg/L) |
|-------------------------------------------------------------------|-------------------------------|
| Acetaminophen-d4                                                  | 800                           |
| Azithromycin-d3                                                   | 900                           |
| Caffeine <sup>13</sup> C <sub>3</sub>                             | 400                           |
| Carbamazepine-d10                                                 | 100                           |
| d,l-Methamphetamine-d5 hydrochloride                              | 200                           |
| Diuron-d6                                                         | 1000                          |
| Diazepam-d5                                                       | 200                           |
| Fluoxetine-d5 hydrochloride                                       | 60                            |
| Gemfibrozil-d6                                                    | 250                           |
| Ibuprofen-d3                                                      | 1000                          |
| Metformin-(dimethyl-d6) hydrochloride                             | 50                            |
| Salicylic acid-d4                                                 | 55                            |
| Sulfamethoxazole-d4                                               | 400                           |
| Topiramate-d12                                                    | 150                           |
| Venlafaxine-d6                                                    | 100                           |

**Note1:** the fifteen isotopically labelled internal standards are listed in the table by alphabetic order.



**Table S4.** Therapeutic class, pharmaceuticals, ionization mode, precursor and product ions, mass spectrometry conditions, ion ratio, and isotopically labelled internal standards (ILIS) for each pharmaceutical in study. Legend: P- Chromatographic program.

| Therapeutic class             | Pharmaceuticals, metabolites, transformation products, and isotopically labelled internal standards (ILIS) <i>Note 1</i> | ESI  | Precursor (m/z) | Quantitation product |              |       |              | Qualifier Product |              |       |              | Dwell Time (msec) | ILIS | P   |
|-------------------------------|--------------------------------------------------------------------------------------------------------------------------|------|-----------------|----------------------|--------------|-------|--------------|-------------------|--------------|-------|--------------|-------------------|------|-----|
|                               |                                                                                                                          |      |                 | m/z                  | Q1           | CE    | Q3           | m/z               | Q1           | CE    | Q3           |                   |      |     |
|                               |                                                                                                                          |      |                 |                      | Pre Bias (V) |       | Pre Bias (V) |                   | Pre Bias (V) |       | Pre Bias (V) |                   |      |     |
| Analgesic                     | Acetaminophen                                                                                                            | ESI- | 150.20          | 107.15               | 16.0         | 20.0  | 17.0         |                   | Note 2       |       |              | 25.0              | 2    | PI  |
| NSAIDs                        | Acetylsalicylic acid                                                                                                     | ESI- | 179.30          | 137.15               | 20.0         | 10.0  | 21.0         | 92.90             | 19.0         | 22.0  | 10.0         | 25.0              | 1    | PI  |
| NSAIDs-metabolite             | Carboxyibuprofen                                                                                                         | ESI- | 235.20          | 191.25               | 25.0         | 9.0   | 16.0         | 72.90             | 24.0         | 17.0  | 11.0         | 25.0              | 3    | PI  |
| NSAIDs                        | Diclofenac                                                                                                               | ESI- | 294.10          | 250.20               | 11.0         | 11.0  | 14.0         | 35.05             | 14.0         | 24.0  | 11.0         | 25.0              | 3    | PI  |
| NSAIDs-metabolite             | 2-Hydroxyibuprofen                                                                                                       | ESI- | 221.20          | 177.30               | 23.0         | 8.0   | 10.0         |                   | Note 2       |       |              | 25.0              | 3    | PI  |
| NSAIDs                        | Ibuprofen                                                                                                                | ESI- | 205.20          | 161.30               | 21.0         | 10.0  | 23.0         |                   | Note 2       |       |              | 25.0              | 3    | PI  |
|                               | Ketoprofen                                                                                                               | ESI- | 253.20          | 209.20               | 27.0         | 7.0   | 12.0         |                   | Note 2       |       |              | 25.0              | 3    | PI  |
|                               | Naproxen                                                                                                                 | ESI- | 229.20          | 170.00               | 24.0         | 16.0  | 17.0         | 169.25            | 25.0         | 31.0  | 17.0         | 25.0              | 3    | PI  |
|                               | Nimesulide                                                                                                               | ESI- | 307.00          | 229.15               | 15.0         | 16.0  | 17.0         | 79.05             | 15.0         | 26.0  | 29.0         | 25.0              | 3    | PI  |
| NSAIDs-transformation product | Salicylic acid                                                                                                           | ESI- | 137.30          | 93.10                | 15.0         | 17.0  | 14.0         | 65.10             | 15.0         | 30.0  | 10.0         | 25.0              | 1    | PI  |
| Antibiotic                    | Azithromycin                                                                                                             | ESI+ | 749.30          | 158.00               | -28.0        | -45.0 | -16.0        | 116.10            | -38.0        | -55.0 | -11.0        | 10.0              | 9    | PII |
|                               | Ciprofloxacin                                                                                                            | ESI+ | 332.00          | 314.05               | -17.0        | -22.0 | -22.0        | 231.00            | -24.0        | -39.0 | -16.0        | 10.0              | 10   | PII |
|                               | Clarithromycin                                                                                                           | ESI+ | 748.30          | 158.05               | -28.0        | -34.0 | -10.0        | 83.00             | -28.0        | -54.0 | -17.0        | 10.0              | 9    | PII |
|                               | Enrofloxacin                                                                                                             | ESI+ | 360.00          | 316.10               | -18.0        | -21.0 | -15.0        | 342.10            | -27.0        | -23.0 | -24.0        | 10.0              | 10   | PII |
|                               | Erythromycin                                                                                                             | ESI+ | 734.40          | 158.00               | -28.0        | -33.0 | -10.0        | 83.00             | -28.0        | -55.0 | -19.0        | 10.0              | 9    | PII |
|                               | Lomefloxacin                                                                                                             | ESI+ | 352.00          | 264.95               | -29.0        | -25.0 | -19.0        | 333.95            | -18.0        | -22.0 | -24.0        | 10.0              | 10   | PII |
|                               | Moxifloxacin                                                                                                             | ESI+ | 402.05          | 384.05               | -21.0        | -23.0 | -26.0        | 95.95             | -15.0        | -48.0 | -20.0        | 10.0              | 10   | PII |
|                               | Norfloxacin                                                                                                              | ESI+ | 320.00          | 302.05               | -27.0        | -22.0 | -21.0        | 231.00            | -26.0        | -43.0 | -16.0        | 10.0              | 10   | PII |
|                               | Ofloxacin                                                                                                                | ESI+ | 362.00          | 318.10               | -29.0        | -21.0 | -15.0        | 260.95            | -29.0        | -29.0 | -18.0        | 10.0              | 10   | PII |
|                               | Prulifloxacin                                                                                                            | ESI+ | 462.00          | 443.95               | -17.0        | -22.0 | -22.0        | 360.00            | -24.0        | -32.0 | -24.0        | 10.0              | 10   | PII |
|                               | Sulfadiazine                                                                                                             | ESI+ | 250.90          | 155.90               | -18.0        | -18.0 | -10.0        | 91.95             | -19.0        | -30.0 | -19.0        | 10.0              | 10   | PII |
|                               | Sulfadimethoxine                                                                                                         | ESI+ | 310.90          | 155.90               | -24.0        | -23.0 | -15.0        | 91.95             | -25.0        | -38.0 | -18.0        | 10.0              | 10   | PII |
|                               | Sulfamethazine                                                                                                           | ESI+ | 278.90          | 185.90               | -23.0        | -19.0 | -12.0        | 91.95             | -22.0        | -36.0 | -19.0        | 10.0              | 10   | PII |
|                               | Sulfamethoxazole                                                                                                         | ESI+ | 253.95          | 155.90               | -29.0        | -18.0 | -16.0        | 91.95             | -20.0        | -32.0 | -18.0        | 10.0              | 10   | PII |
|                               | Sulfamethoxypyridazine                                                                                                   | ESI+ | 280.90          | 155.95               | -14.0        | -19.0 | -10.0        | 92.00             | -14.0        | -32.0 | -18.0        | 10.0              | 10   | PII |
|                               | Sulfapyridine                                                                                                            | ESI+ | 249.90          | 155.95               | -18.0        | -18.0 | -16.0        | 91.95             | -28.0        | -31.0 | -20.0        | 10.0              | 10   | PII |
|                               | Trimethoprim                                                                                                             | ESI+ | 291.00          | 230.00               | -23.0        | -25.0 | -15.0        | 123.00            | -23.0        | -27.0 | -12.0        | 10.0              | 10   | PII |
| Pshychiatric drugs            | Carbamazepine                                                                                                            | ESI+ | 236.95          | 193.95               | -18.0        | -21.0 | -23.0        | 193.00            | -26.0        | -36.0 | -13.0        | 10.0              | 11   | PII |
|                               | Citalopram                                                                                                               | ESI+ | 325.05          | 108.95               | -16.0        | -29.0 | -23.0        | 261.95            | -16.0        | -22.0 | -18.0        | 10.0              | 12   | PII |
|                               | Diazepam                                                                                                                 | ESI+ | 284.95          | 153.90               | -23.0        | -29.0 | -10.0        | 192.95            | -23.0        | -33.0 | -23.0        | 10.0              | 7    | PII |
| Pshychiatric drugs-metabolite | 10,11-Epoxy carbamazepine                                                                                                | ESI+ | 253.00          | 179.95               | -21.0        | -27.0 | -12.0        | 235.90            | -21.0        | -12.0 | -16.0        | 10.0              | 11   | PII |

|                                                       |                           |      |        |         |       |       |       |        |        |       |       |      |     |      |
|-------------------------------------------------------|---------------------------|------|--------|---------|-------|-------|-------|--------|--------|-------|-------|------|-----|------|
| Pshychiatric drugs                                    | Fluoxetine                | ESI+ | 309.95 | 44.00   | -25.0 | -14.0 | -18.0 |        | Note 2 |       | 10.0  | 12   | PII |      |
| Pshychiatric drugs -metabolite                        | Norfluoxetine             | ESI+ | 296.00 | 134.0   | -23.0 | -8.0  | -13.0 | 30.20  | -24.0  | -15.0 | -12.0 | 10.0 | 12  | PII  |
|                                                       | Norsertraline             | ESI+ | 291.90 | 274.90  | -23.0 | -11.0 | -19.0 | 158.95 | -22.0  | -24.0 | -10.0 | 10.0 | 12  | PII  |
| Pshychiatric drugs                                    | Paroxetine                | ESI+ | 330.00 | 70.0    | -27.0 | -34.0 | -14.0 | 44.0   | -37.0  | -28.0 | -14.0 | 10.0 | 12  | PII  |
|                                                       | Sertraline                | ESI+ | 305.95 | 158.90  | -15.0 | -26.0 | -15.0 | 274.95 | -25.0  | -13.0 | -19.0 | 10.0 | 12  | PII  |
|                                                       | Trazodone                 | ESI+ | 372.05 | 175.95  | -19.0 | -26.0 | -11.0 | 147.95 | -19.0  | -40.0 | -15.0 | 10.0 | 12  | PII  |
|                                                       | Venlafaxine               | ESI+ | 278.10 | 58.00   | -20.0 | -25.0 | -20.0 | 260.05 | -23.0  | -14.0 | -12.0 | 10.0 | 13  | PII  |
| Antibiotic                                            | Ampicillin                | ESI+ | 348.00 | 307.05  | -17.0 | -10.0 | -21.0 |        | Note 2 |       | 15.0  | 12   | PII |      |
| Lipid regulator and cholesterol lowering statin drugs | Atorvastatin              | ESI+ | 559.10 | 440.05  | -20.0 | -24.0 | -16.0 | 250.00 | -20.0  | -47.0 | -16.0 | 15.0 | 12  | PII  |
| β-blockers                                            | Atenolol                  | ESI+ | 267.05 | 144.95  | -10.0 | -28.0 | -15.0 | 56.00  | -22.0  | -34.0 | -11.0 | 15.0 | 12  | PII  |
| Stimulant                                             | Caffeine                  | ESI+ | 194.95 | 138.00  | -22.0 | -21.0 | -13.0 | 42.00  | -23.0  | -41.0 | -16.0 | 15.0 | 8   | PII  |
| Antibiotic                                            | Chlorocycline             | ESI+ | 479.00 | 444.00  | -24.0 | -24.0 | -15.0 | 462.00 | -24.0  | -20.0 | -22.0 | 15.0 | 12  | PII  |
| Antipsychotic drugs                                   | Chlorpromazine            | ESI+ | 319.00 | 85.95   | -22.0 | -21.0 | -18.0 | 58.00  | -25.0  | -43.0 | -12.0 | 15.0 | 12  | PII  |
| Pshychiatric drugs -metabolite                        | Demethylcitalopram        | ESI+ | 352.05 | 311.00  | -29.0 | -8.0  | -15.0 | 108.95 | -18.0  | -34.0 | -22.0 | 15.0 | 12  | PII  |
|                                                       | Didemethylcitalopram      | ESI+ | 297.00 | 108.95  | -25.0 | -23.0 | -10.0 | 262.00 | -23.0  | -15.0 | -18.0 | 15.0 | 12  | PII  |
|                                                       | Citalopram N-oxide        | ESI+ | 341.05 | 108.95  | -17.0 | -26.0 | -10.0 | 261.95 | -28.0  | -19.0 | -18.0 | 15.0 | 12  | PII  |
|                                                       | O-Desmethylvenlafaxine    | ESI+ | 264.00 | 58.00   | -20.0 | -25.0 | -20.0 | 246.05 | -21.0  | -13.0 | -17.0 | 15.0 | 13  | PII  |
| Calcium channel blocker                               | Diltiazem                 | ESI+ | 415.05 | 178.00  | -20.0 | -30.0 | -20.0 | 150.00 | -13.0  | -48.0 | -15.0 | 15.0 | 12  | PII  |
| Antibiotic                                            | Doxycycline               | ESI+ | 445.05 | 428.05  | -17.0 | -21.0 | -15.0 | 97.95  | -17.0  | -47.0 | -20.0 | 15.0 | 12  | PII  |
| Fibrate lipid lowering agent                          | Fenofibrate               | ESI+ | 361.00 | 232.855 | -29.0 | -16.0 | -16.0 | 138.95 | -18.0  | -35.0 | -13.0 | 15.0 | 12  | PII  |
| Proton pump inhibitor                                 | Lanzoprazole              | ESI+ | 370.00 | 251.90  | -19.0 | -13.0 | -17.0 | 118.90 | -30.0  | -17.0 | -12.0 | 15.0 | 12  | PII  |
| Antidiabetic drugs                                    | Metformin                 | ESI+ | 129.50 | 70.95   | -10.0 | -24.0 | -14.0 | 59.95  | -10.0  | -15.0 | -13.0 | 15.0 | 16  | PII  |
| Antibiotic                                            | Oxytetracycline           | ESI+ | 460.95 | 425.95  | -23.0 | -20.0 | -15.0 | 443.05 | -17.0  | -15.0 | -22.0 | 15.0 | 12  | PII  |
| β-blockers                                            | Propanolol                | ESI+ | 301.00 | 260.00  | -25.0 | -8.0  | -18.0 |        | Note 2 |       | 15.0  | 12   | PII |      |
| Lipid regulator and cholesterol lowering statin drugs | Simvastatin               | ESI+ | 419.15 | 199.00  | -15.0 | -15.0 | -13.0 | 285.00 | -16.0  | -13.0 | -20.0 | 15.0 | 12  | PII  |
| Antibiotic                                            | Sulfamethizole            | ESI+ | 270.85 | 155.95  | -13.0 | -16.0 | -19.0 | 92.00  | -21.0  | -31.0 | -19.0 | 15.0 | 10  | PII  |
|                                                       | Sulfaquinoxaline          | ESI+ | 300.90 | 155.95  | -25.0 | -19.0 | -10.0 | 92.00  | -25.0  | -37.0 | -18.0 | 15.0 | 10  | PII  |
|                                                       | Sulfathiazole             | ESI+ | 255.85 | 155.90  | -19.0 | -17.0 | -16.0 | 92.00  | -19.0  | -29.0 | -18.0 | 15.0 | 10  | PII  |
|                                                       | Tetracycline              | ESI+ | 445.05 | 410.00  | -13.0 | -22.0 | -20.0 | 153.95 | -22.0  | -29.0 | -15.0 | 15.0 | 12  | PII  |
| Antibiotic                                            | Amoxicillin               | ESI- | 364.10 | 223.00  | 17.0  | 11.0  | 12.0  | 205.95 | 18.0   | 18.0  | 28.0  | 25.0 | 5   | PIII |
| Pshychiatric drugs- metabolite                        | Citalopram propionic acid | ESI- | 310.05 | 266.10  | 15.0  | 11.0  | 11.0  | 236.20 | 30.0   | 18.0  | 10.0  | 25.0 | 5   | PIII |
| Lipid regulator and cholesterol lowering statin drugs | Gemfibrozil               | ESI- | 249.20 | 120.95  | 26.0  | 13.0  | 11.0  | 105.95 | 27.0   | 50.0  | 15.0  | 25.0 | 5   | PIII |
| Stimulant, anorectic, anxiolytics, laxatives          | Phenolphthalein           | ESI- | 317.20 | 93.10   | 30.0  | 14.0  | 10.0  | 273.20 | 28.0   | 18.0  | 15.0  | 25.0 | 4   | PIII |
| Lipid regulator and cholesterol lowering statin drugs | Pravastatin               | ESI- | 423.15 | 101.15  | 21.0  | 30.0  | 15.0  | 58.85  | 20.0   | 24.0  | 17.0  | 25.0 | 5   | PIII |
| Stimulant, anorectic, anxiolytics, laxatives          | Topiramate                | ESI- | 338.10 | 78.05   | 21.0  | 31.0  | 13.0  | 95.85  | 16.0   | 25.0  | 10.0  | 25.0 | 4   | PIII |
|                                                       | Zonisamide                | ESI- | 211.10 | 118.95  | 22.0  | 15.0  | 18.0  | 147.20 | 22.0   | 11.0  | 11.0  | 25.0 | 4   | PIII |
| Stimulant, anorectic, anxiolytics, laxatives          | Alprazolam                | ESI+ | 308.50 | 280.90  | -25.0 | -29.0 | -19.0 | 205.05 | -12.0  | -43.0 | -14.0 | 15.0 | 7   | PIV  |
|                                                       | Anfepramone               | ESI+ | 205.80 | 105.00  | -24.0 | -24.0 | -20.0 | 100.00 | -10.0  | -25.0 | -20.0 | 15.0 | 6   | PIV  |
|                                                       | Bupropion                 | ESI+ | 239.90 | 184.00  | -29.0 | -14.0 | -20.0 | 130.95 | -27.0  | -30.0 | -12.0 | 15.0 | 6   | PIV  |

|                                                 |                                                  |      |        |        |       |       |        |        |       |       |       |      |    |      |
|-------------------------------------------------|--------------------------------------------------|------|--------|--------|-------|-------|--------|--------|-------|-------|-------|------|----|------|
|                                                 | <i>d</i> -Cathine                                | ESI+ | 151.90 | 134.00 | -17.0 | -15.0 | -13.0  | 116.95 | -17.0 | -20.0 | -11.0 | 15.0 | 6  | PIV  |
|                                                 | Clobenzorex                                      | ESI+ | 260.00 | 91.00  | -17.0 | -27.0 | -18.0  | 119.00 | -21.0 | -17.0 | -11.0 | 15.0 | 6  | PIV  |
|                                                 | (+)-Ephedrine                                    | ESI+ | 165.90 | 148.00 | -20.0 | -15.0 | -16.0  | 116.95 | -18.0 | -22.0 | -11.0 | 15.0 | 6  | PIV  |
|                                                 | Fenfluramine                                     | ESI+ | 231.90 | 159.90 | -27.0 | -230  | -10.0  | 109.00 | -26.0 | -48.0 | -10.0 | 15.0 | 6  | PIV  |
|                                                 | Lorazepam                                        | ESI+ | 320.90 | 274.85 | -26.0 | -24.0 | -18.0  | 302.90 | -26.0 | -17.0 | -14.0 | 15.0 | 7  | PIV  |
|                                                 | Mazindol                                         | ESI+ | 284.90 | 44.00  | -23.0 | -27.0 | -17.0  | Note 2 |       |       |       | 15.0 | 6  | PIV  |
|                                                 | <i>d,l</i> -Methamphetamine                      | ESI+ | 149.80 | 91.05  | -11.0 | -22.0 | -17.0  | 119.10 | -11.0 | -17.0 | -24.0 | 15.0 | 6  | PIV  |
|                                                 | <i>d,l</i> -Norephedrine                         | ESI+ | 151.80 | 134.10 | -10.0 | -15.0 | -14.0  | 117.05 | -10.0 | -21.0 | -23.0 | 15.0 | 6  | PIV  |
|                                                 | Phentermine                                      | ESI+ | 149.90 | 90.95  | -17.0 | -22.0 | -20.0  | 18.05  | -17.0 | -9.0  | -20.0 | 15.0 | 6  | PIV  |
|                                                 | Rimonabant                                       | ESI+ | 462.90 | 362.90 | -23.0 | -30.0 | -25.0  | 84.00  | -23.0 | -28.0 | -18.0 | 15.0 | 6  | PIV  |
|                                                 | Sibutramine                                      | ESI+ | 279.90 | 124.90 | -23.0 | -26.0 | -13.0  | 139.00 | -19.0 | -17.0 | -14.0 | 15.0 | 6  | PIV  |
|                                                 | Synephrine                                       | ESI+ | 167.90 | 149.95 | -19.0 | -12.0 | 18.0   | 90.95  | -19.0 | -23.0 | -19.0 | 15.0 | 6  | PIV  |
| Isotopically labelled internal standards (ILIS) | 1-Salicylin acid-d4 (ILIS 1)                     | ESI- | 141.00 | 97.05  | 16.0  | 17.0  | 20.0   | Note 3 |       |       |       | 25.0 | -  | PI   |
|                                                 | 2-Acetaminophen-d4 (ILIS 2)                      | ESI- | 154.10 | 111.05 | 20.0  | 20.0  | 20.0   | Note 3 |       |       |       | 25.0 | -  | PI   |
|                                                 | 3-Ibuprofen-d3 (ILIS 3)                          | ESI- | 208.00 | 164.00 | 21.0  | 10.0  | 23.0   | Note 3 |       |       |       | 25.0 | -  | PI   |
|                                                 | 4-Topiramate-d12 (ILIS 4)                        | ESI- | 350.20 | 77.95  | 21.0  | 31.0  | 13.0   | Note 3 |       |       |       | 25.0 | -  | PIII |
|                                                 | 5-Gemfibrazil-d6 (ILIS 5)                        | ESI- | 255.20 | 121.10 | 26.0  | 13.0  | 11.0   | Note 3 |       |       |       | 25.0 | -  | PIII |
|                                                 | 6-d,l-Methamphetamine-d5 (ILIS 6)                | ESI+ | 154.70 | 92.10  | -11.0 | -21.0 | -17.0  | Note 3 |       |       |       | 15.0 | -  | PIV  |
|                                                 | 7-Diazepam-d5** (ILIS 7)                         | ESI+ | 289.90 | 154.05 | -23.0 | -31.0 | -10.0- | Note 3 |       |       |       | 10.0 | -- | PII  |
|                                                 | 7-Diazepam-d5*** (ILIS 7)                        | ESI+ | 289.90 | 154.05 | -23.0 | -31.0 | 10.0   | Note 3 |       |       |       | 15.0 | -  | PIV  |
|                                                 | 8-Caffeine <sup>13</sup> C <sub>3</sub> (ILIS 8) | ESI+ | 197.95 | 140.05 | -22.0 | -22.0 | -14.0  | Note 3 |       |       |       | 10.0 | -  | PII  |
|                                                 | 9-Azithromycin-d3 (ILIS 9)                       | ESI+ | 752.30 | 83.15  | -38.0 | -55.0 | -11.0  | Note 3 |       |       |       | 10.0 | -  | PII  |
|                                                 | 10-Sulfamethoxazole-d4 (ILIS 10)                 | ESI+ | 258.00 | 96.10  | -29.0 | -18.0 | -16.0  | Note 3 |       |       |       | 10.0 | -  | PII  |
|                                                 | 11-Carbamazepine-d10 (ILIS 11)                   | ESI+ | 246.95 | 204.10 | -18.0 | -22.0 | -23.0  | Note 3 |       |       |       | 10.0 | -  | PII  |
|                                                 | 12-Fluoxetine-d5 (ILIS 12)                       | ESI+ | 315.05 | 44.05  | -25.0 | -15.0 | -20.0  | Note 3 |       |       |       | 10.0 | -  | PII  |
|                                                 | 13-Venlafaxine-d6 (ILIS 13)                      | ESI+ | 283.80 | 64.05  | -20.0 | -25.0 | -20.0  | Note 3 |       |       |       | 10.0 | -  | PII  |
|                                                 | 14-Metformin-d6 (ILIS 14)                        | ESI+ | 135.95 | 60.10  | -10.0 | -16.0 | -13.0  | Note 3 |       |       |       | 10.0 | -  | PII  |

\*\* Conditions of diazepam-d5 in program II; \*\*\* Conditions of diazepam-d5 in program IV

**Note 1:** Pharmaceuticals organized in the table by alphabetic order in each chromatographic program; **Note 2:** Only one transition could be recorded due to the poor fragmentation of the compound [Gros M, Petrović M, Barceló D. Development of a multi-residue analytical methodology based on liquid chromatography–tandem mass spectrometry (LC–MS/MS) for screening and trace level determination of pharmaceuticals in surface and wastewaters. Talanta 2006; 70: 678-690]; **Note 3:** For the isotopically labelled internal standards only one transition is needed.

**Table S5.** Chemical family, pesticides type, name of each pesticides, ionization mode, precursor and product ions, mass spectrometry conditions, ion ratio, and isotopically labelled internal standards (ILIS). Legend: P- Chromatographic program.

| Chemical Family, Pesticide Type                                 | Pesticides, transformation products, and isotopically labelled internal standards (ILIS) <sup>Note 1</sup> | ESI  | Precursor (m/z) | Quantitation product |              |       |              | Qualifier Product |       |              |       | Dwell Time (msec) | ILIS | P  |
|-----------------------------------------------------------------|------------------------------------------------------------------------------------------------------------|------|-----------------|----------------------|--------------|-------|--------------|-------------------|-------|--------------|-------|-------------------|------|----|
|                                                                 |                                                                                                            |      |                 | m/z                  | Q1           | CE    | Q3           | m/z               | Q1    | CE           | Q3    |                   |      |    |
|                                                                 |                                                                                                            |      |                 |                      | Pre Bias (V) |       | Pre Bias (V) |                   |       | Pre Bias (V) |       |                   |      |    |
| Chloroacetanilide, Herbicide                                    | Alachlor                                                                                                   | ESI+ | 270.00          | 238.05               | -21.0        | -13.0 | -16.0        | 45.00             | -30.0 | -30.0        | -17.0 | 2.5               | 15   | PV |
| 1,3,5-triazine, Herbicide                                       | Ametryn                                                                                                    | ESI+ | 228.00          | 185.95               | -22.0        | -21.0 | -21.0        | 67.95             | -27.0 | -41.0        | -14.0 | 2.5               | 15   | PV |
| Carbamate, Herbicide                                            | Asulam                                                                                                     | ESI+ | 230.90          | 155.95               | -18.0        | -13.0 | -16.0        | 91.90             | -19.0 | -28.0        | -19.0 | 2.5               | 15   | PV |
| 1,3,5-triazine, Herbicide                                       | Atrazine                                                                                                   | ESI+ | 215.95          | 173.95               | -25.0        | -19.0 | -11.0        | 43.00             | -25.0 | -44.0        | -16.0 | 2.5               | 15   | PV |
| 1,3,5-triazine, atrazine degradation product                    | Atrazine-desethyl                                                                                          | ESI+ | 187.95          | 145.95               | -16.0        | -19.0 | -15.0        | 43.00             | -22.0 | -38.0        | -17.0 | 2.5               | 15   | PV |
| 1,3,5-triazine, atrazine degradation product                    | Atrazine-desisopropyl                                                                                      | ESI+ | 173.90          | 43.00                | -21.0        | -34.0 | -17.0        | 67.95             | -20.0 | -30.0        | -12.0 | 2.5               | 15   | PV |
| Organophosphorus, Insecticide; acaricide; molluscicide          | Azinphos-methyl                                                                                            | ESI+ | 317.90          | 159.95               | -26.0        | -10.0 | -10.0        | 131.95            | -15.0 | -18.0        | -14.0 | 2.5               | 15   | PV |
| Strobilurin analog, Fungicide                                   | Azoxystrobin                                                                                               | ESI+ | 403.95          | 372.05               | -21.0        | -16.0 | -26.0        | 329.00            | -20.0 | -32.0        | -15.0 | 2.5               | 15   | PV |
| Sulfonylurea, Herbicide                                         | Bensulfuron-methyl                                                                                         | ESI+ | 410.95          | 148.95               | -20.0        | -23.0 | -16.0        | 182.00            | -20.0 | -21.0        | -12.0 | 2.5               | 15   | PV |
| Benzothiazinone, Herbicide                                      | Bentazon                                                                                                   | ESI- | 239.15          | 132.20               | 26.0         | 26.0  | 14.0         | 175.20            | 25.0  | 19.0         | 10.0  | 2.5               | 15   | PV |
| Carbamate, Insecticide; plant growth regulator                  | Carbaryl                                                                                                   | ESI+ | 201.90          | 145.00               | -22.0        | -12.0 | -17.0        | 127.00            | -25.0 | -32.0        | -12.0 | 2.5               | 15   | PV |
| Carbamate, Insecticide; nematocide                              | Carbofuran                                                                                                 | ESI+ | 221.95          | 165.05               | -26.0        | -13.0 | -11.0        | 122.95            | -27.0 | -23.0        | -12.0 | 2.5               | 15   | PV |
| Organophosphorus, Insecticide; acaricide                        | Chlorfenvinphos                                                                                            | ESI+ | 360.85          | 98.90                | -29.0        | -32.0 | -20.0        | 155.00            | -18.0 | -15.0        | -10.0 | 2.5               | 15   | PV |
| Urea, Herbicide                                                 | Chlortoluron                                                                                               | ESI+ | 212.95          | 71.95                | -14.0        | -21.0 | -15.0        | 46.00             | -18.0 | -17.0        | -18.0 | 2.5               | 15   | PV |
| Carbamate, Herbicide; plant growth regulator                    | Chlorpropham                                                                                               | ESI+ | 212.90          | 71.95                | -24.0        | -24.0 | -15.0        | 46.00             | -25.0 | -18.0        | -18.0 | 2.5               | 15   | PV |
| Organophosphorus, Insecticide, acaricide                        | Dimethoate                                                                                                 | ESI+ | 229.90          | 198.80               | -19.0        | -10.0 | -14.0        | 124.95            | -11.0 | -23.0        | -12.0 | 2.5               | 15   | PV |
| Urea, Herbicide                                                 | Diuron                                                                                                     | ESI+ | 232.90          | 71.95                | -28.0        | -22.0 | -15.0        | 46.00             | -28.0 | -18.0        | -16.0 | 2.5               | 15   | PV |
| Urea, Herbicide                                                 | Imidacloprid                                                                                               | ESI+ | 255.95          | 209.10               | -29.0        | -16.0 | -14.0        | 175.10            | -20.0 | -19.0        | -11.0 | 2.5               | 15   | PV |
| Urea, Herbicide                                                 | Isoproturon                                                                                                | ESI+ | 207.00          | 71.95                | -25.0        | -22.0 | -15.0        | 46.00             | -24.0 | -21.0        | -18.0 | 2.5               | 15   | PV |
| Urea, Herbicide                                                 | Linuron                                                                                                    | ESI+ | 249.05          | 208.00               | -28.0        | -7.0  | -15.0        | 159.95            | -27.0 | -19.0        | -18.0 | 2.5               | 15   | PV |
| Organophosphorus, Insecticide; acaricide; veterinary substance  | Melathion                                                                                                  | ESI+ | 332.90          | 127.00               | -25.0        | -14.0 | -13.0        | 286.80            | -28.0 | -9.0         | -20.0 | 2.5               | 15   | PV |
| Phenylamide (acylalanine type), Fungicide                       | Metolachlor                                                                                                | ESI+ | 284.00          | 252.00               | -14.0        | -16.0 | -18.0        | 176.05            | -24.0 | -27.0        | -11.0 | 2.5               | 15   | PV |
| Carbamate, Molluscicide; insecticide; acaricide; bird repellent | Metalaxyl                                                                                                  | ESI+ | 218.10          | 42.90                | -11.0        | -32.0 | -15.0        | Note 2            |       |              |       |                   | 15   | PV |
| Carbamate, metabolite                                           | Methiocarb                                                                                                 | ESI+ | 226.10          | 169.05               | -15.0        | -12.0 | -15.0        | 121.00            | -19.0 | -21.0        | -12.0 | 2.5               | 15   | PV |
| Carbamate, metabolite                                           | Methiocarbe sulfone                                                                                        | ESI+ | 282.90          | 242.10               | -23.0        | -8.0  | -16.0        | 185.10            | -22.0 | -20.0        | -12.0 | 2.5               | 15   | PV |
| Urea, Herbicide                                                 | Methiocarbe sulfoxide                                                                                      | ESI+ | 241.95          | 185.10               | -29.0        | -15.0 | -23.0        | 122.10            | -28.0 | -32.0        | -11.0 | 2.5               | 15   | PV |
| Urea, Herbicide                                                 | Metobromuron                                                                                               | ESI+ | 258.90          | 148.00               | -19.0        | -16.0 | -14.0        | 170.00            | -20.0 | -21.0        | -11.0 | 2.5               | 15   | PV |
| Carbamate, Insecticide                                          | Monolinuron                                                                                                | ESI+ | 215.05          | 125.90               | -14.0        | -18.0 | -12.0        | 148.00            | -22.0 | -16.0        | -18.0 | 2.5               | 15   | PV |
| Carbamate, Insecticide                                          | Pirimicarb                                                                                                 | ESI+ | 239.05          | 71.95                | -20.0        | -22.0 | -20.0        | 182.00            | -18.0 | -17.0        | -12.0 | 2.5               | 15   | PV |
| Anilinopyrimidine, Fungicide                                    | Propoxur                                                                                                   | ESI+ | 210.00          | 111.00               | -17.0        | -16.0 | -10.0        | 168.00            | -14.0 | -10.0        | -11.0 | 2.5               | 15   | PV |
| 1,3,5-traizine, Herbicide                                       | Pyrimethanil                                                                                               | ESI+ | 200.00          | 106.95               | -13.0        | -27.0 | -10.0        | 82.00             | -16.0 | -29.0        | -17.0 | 2.5               | 15   | PV |
| Thiocarbamate, Herbicide                                        | Terbutylazine                                                                                              | ESI+ | 229.95          | 174.00               | -20.0        | -19.0 | -20.0        | 95.90             | -27.0 | -30.0        | -19.0 | 2.5               | 15   | PV |
| Chloroacetanilide, Herbicide                                    | Thiobencarb                                                                                                | ESI+ | 257.95          | 124.95               | -22.0        | -17.0 | -11.0        | 88.90             | -13.0 | -50.0        | -17.0 | 2.5               | 15   | PV |
| Isotopically labelled internal standards (ILIS)                 | Diuron-d6 (ILIS 15)                                                                                        | ESI+ | 240.95          | 78.00                | -28.0        | -25.0 | -16.0        | Note 3            |       |              |       | 2.5               | 15   | PV |

P-Chromatographic program. **Note 1:** Pesticides organized by alphabetic order; **Note 2:** Only one transition could be recorded due to the poor fragmentation of the compound. **Note 3:** For the Isotopically labelled internal standards only one transition is needed.

**Table S6.** Chromatographic programs and mass spectrometry conditions used in the negative and positive ionization modes for pharmaceutical and pesticides analysis.

| Chromatographic program | ESI mode | Compounds       | Chromatographic Column                                                                                                                                                                              | Eluents                                         | Mode of elution | Source dependent parameters |                                                                        |
|-------------------------|----------|-----------------|-----------------------------------------------------------------------------------------------------------------------------------------------------------------------------------------------------|-------------------------------------------------|-----------------|-----------------------------|------------------------------------------------------------------------|
| Program I               | Negative | Pharmaceuticals | Column: Kinetex C18 column (2.6 x 150 mm i.d., 1.7 μm particle size) from Phenomenex, Inc. (California, USA).<br>Flow rate: 0.22 mL/min<br>Oven temperature=30°C<br>Injection volume= 5 μL          | Eluent A<br>Ultra-pure water                    | Time (min)      | %Acetonitrile               | NGF=2.6 L/min<br>DGF=12.5 L/min<br>IV=5.0 kV<br>DLT=250°C<br>HBT=300°C |
|                         |          |                 |                                                                                                                                                                                                     |                                                 | 0.0             | 30.0                        |                                                                        |
|                         |          |                 |                                                                                                                                                                                                     | Eluent B<br>Acetonitrile                        | 1.0             | 35.6                        |                                                                        |
|                         |          |                 |                                                                                                                                                                                                     |                                                 | 2.0             | 100                         |                                                                        |
|                         |          |                 |                                                                                                                                                                                                     |                                                 | 6.0             | 100                         |                                                                        |
|                         |          |                 |                                                                                                                                                                                                     |                                                 | 6.5             | 30.0                        |                                                                        |
|                         |          |                 |                                                                                                                                                                                                     |                                                 | 10.5            | 30.0                        |                                                                        |
| Program II              | Positive | Pharmaceuticals | Column: Cortecs™ UPLC® C18+ column (100 x 2.1 mm i.d.; 1.6 μm particle size) from Waters (Milford, Massachusetts, USA)<br>Flow rate: 0.30 mL/min<br>Oven temperature=30°C<br>Injection volume= 5 μL | Eluent A<br>0.1% formic acid in ultrapure water | Time (min)      | %Acetonitrile               | NGF=2.6 L/min<br>DGF=15 L/min<br>IV=5.0 kV<br>DLT=300°C<br>HBT=425°C   |
|                         |          |                 |                                                                                                                                                                                                     |                                                 | 0.0             | 5                           |                                                                        |
|                         |          |                 |                                                                                                                                                                                                     |                                                 | 3.0             | 100                         |                                                                        |
|                         |          |                 |                                                                                                                                                                                                     | Eluent B<br>acetonitrile                        | 3.5             | 100                         |                                                                        |
|                         |          |                 |                                                                                                                                                                                                     |                                                 | 4.0             | 5                           |                                                                        |
|                         |          |                 |                                                                                                                                                                                                     |                                                 | 7.0             | 5                           |                                                                        |
|                         |          |                 |                                                                                                                                                                                                     |                                                 |                 |                             |                                                                        |
| Program III             | Negative | Pharmaceuticals | Column: Kinetex C18 column (2.6 x 150 mm i.d., 1.7 μm particle size) from Phenomenex, Inc. (California, USA)<br>Flow rate: 0.30 mL/min<br>Oven temperature=30°C<br>Injection volume= 5 μL           | Eluent A<br>Ultra-pure water                    | Time (min)      | %Acetonitrile               | NGF=2.6 L/min<br>DGF=15 L/min<br>IV=5.0 kV<br>DLT=300°C<br>HBT=425°C   |
|                         |          |                 |                                                                                                                                                                                                     |                                                 | 0.0             | 10                          |                                                                        |
|                         |          |                 |                                                                                                                                                                                                     | Eluent B<br>Acetonitrile                        | 5.5             | 100                         |                                                                        |
|                         |          |                 |                                                                                                                                                                                                     |                                                 | 6.5             | 100                         |                                                                        |
|                         |          |                 |                                                                                                                                                                                                     |                                                 | 7.0             | 10                          |                                                                        |
|                         |          |                 |                                                                                                                                                                                                     |                                                 | 9.0             | 10                          |                                                                        |
|                         |          |                 |                                                                                                                                                                                                     |                                                 |                 |                             |                                                                        |
| Program IV              | Positive | Pharmaceuticals | Column: Kinetex C18 column (2.6 x 150 mm i.d., 1.7 μm particle size) from Phenomenex, Inc. (California, USA)<br>Flow rate: 0.30 mL/min<br>Oven temperature=30°C<br>Injection volume= 5 μL           | Eluent A<br>0.1% formic acid in ultrapure water | Time (min)      | %Acetonitrile               | NGF=2.6 L/min<br>DGF=15 L/min<br>IV=5.0 kV<br>DLT=300°C<br>HBT=425°C   |
|                         |          |                 |                                                                                                                                                                                                     |                                                 | 0.0             | 5                           |                                                                        |
|                         |          |                 |                                                                                                                                                                                                     |                                                 | 1.0             | 5                           |                                                                        |
|                         |          |                 |                                                                                                                                                                                                     | Eluent B<br>acetonitrile                        | 2.0             | 100                         |                                                                        |
|                         |          |                 |                                                                                                                                                                                                     |                                                 | 7.0             | 100                         |                                                                        |
|                         |          |                 |                                                                                                                                                                                                     |                                                 | 8.5             | 5                           |                                                                        |
|                         |          |                 |                                                                                                                                                                                                     |                                                 | 11.0            | 5                           |                                                                        |
| Program V               | Positive | Pesticides      | Column: Luna OMEGA C18 column (2.1 x 150 mm i.d., 1.6 μm particle size) from Phenomenex, Inc. (California, USA)<br>Flow rate: 0.30 mL/min<br>Oven temperature=30°C<br>Injection volume= 5 μL        | Eluent A<br>0.1% formic acid in ultrapure water | Time (min)      | %Acetonitrile               | NGF=3.0 L/min<br>DGF=16 L/min<br>IV=5.0 kV<br>DLT=200°C<br>HBT=250°C   |
|                         |          |                 |                                                                                                                                                                                                     |                                                 | 0.0             | 5                           |                                                                        |
|                         |          |                 |                                                                                                                                                                                                     |                                                 | 3.0             | 100                         |                                                                        |
|                         |          |                 |                                                                                                                                                                                                     | Eluent B<br>acetonitrile                        | 5.0             | 100                         |                                                                        |
|                         |          |                 |                                                                                                                                                                                                     |                                                 | 6.0             | 5                           |                                                                        |
|                         |          |                 |                                                                                                                                                                                                     |                                                 | 10.0            | 5                           |                                                                        |
|                         |          |                 |                                                                                                                                                                                                     |                                                 |                 |                             |                                                                        |

NGF-Nebulizing gas flow (nitrogen), DGF-Drying gas flow (nitrogen), IV-Interface voltage, DLT-Desolvation line temperature, and HBT-Heat block temperature.

**Table S7.** Retention time, regression, detection and quantitation limits for each transition and ion ratio for each pharmaceutical.

| Pharmaceutical       | MRM          | Retention time   |            |    | Regression                         |          | LOD<br>(µg/L) | LOQ<br>(µg/L) | Ion Ratio |            |    |                   |                    |
|----------------------|--------------|------------------|------------|----|------------------------------------|----------|---------------|---------------|-----------|------------|----|-------------------|--------------------|
|                      |              | Average<br>(min) | RSD<br>(%) | n  | Equation                           | R        |               |               | Average   | RSD<br>(%) | n  | -20%<br>ion ratio | + 20%<br>ion ratio |
| Acetaminophen        | Quantitation | 1.661            | 3.39       | 34 | $Y = (1.12153)X + (-0.00489729)$   | 0.999910 | 3.48          | 10.56         | Note 1    |            |    |                   |                    |
| Acetylsalicylic acid | Quantitation | 1.677            | 6.55       | 35 | $Y = (0.0231806)X + (0.0124567)$   | 0.999210 | 0.140         | 0.410         | 2.03      | 4.75       | 23 | 1.62              | 2.43               |
|                      | Qualifier    | 1.685            | 6.42       | 34 | $Y = (0.0120497)X + (0.00565358)$  | 0.999887 | 0.050         | 0.170         |           |            |    |                   |                    |
| Alprazolam           | Quantitation | 3.599            | 0.156      | 35 | $Y = (0.179327)X + (0.0469456)$    | 0.999757 | 0.010         | 0.050         | 1.88      | 4.95       | 14 | 1.50              | 2.25               |
|                      | Qualifier    | 3.599            | 0.136      | 33 | $Y = (0.108434)X + (0.0108339)$    | 0.999802 | 0.070         | 0.240         |           |            |    |                   |                    |
| Amoxicillin          | Quantitation | 1.281            | 1.61       | 32 | $Y = (0.0393282)X + (0.000213570)$ | 0.999854 | 0.090         | 0.280         | 2.61      | 4.03       | 18 | 2.09              | 3.14               |
|                      | Qualifier    | 1.281            | 1.55       | 31 | $Y = (0.0152365)X + (0.000264637)$ | 0.999890 | 0.010         | 0.040         |           |            |    |                   |                    |
| Ampicillin           | Quantitation | 2.816            | 0.364      | 35 | $Y = (0.205343)X + (0.0100769)$    | 0.999977 | 0.090         | 0.320         | Note 1    |            |    |                   |                    |
| Anfepramone          | Quantitation | 3.277            | 0.115      | 36 | $Y = (13.0628)X + (0.0752357)$     | 0.999995 | 0.030         | 0.120         | 1.39      | 2.79       | 28 | 1.11              | 1.66               |
|                      | Qualifier    | 3.279            | 0.157      | 36 | $Y = (9.71745)X + (-0.0243496)$    | 0.999993 | 0.010         | 0.030         |           |            |    |                   |                    |
| Astorvatatin         | Quantitation | 3.538            | 0.055      | 36 | $Y = (0.872547)X + (-0.158568)$    | 0.999626 | 0.020         | 0.080         | 1.84      | 2.44       | 24 | 1.47              | 2.20               |
|                      | Qualifier    | 3.538            | 0.055      | 36 | $Y = (0.462852)X + (-0.0728353)$   | 0.999674 | 0.040         | 0.140         |           |            |    |                   |                    |
| Atenolol             | Quantitation | 0.913            | 0.532      | 35 | $Y = (0.283783)X + (-0.0167443)$   | 0.999853 | 2.95          | 9.82          | 1.05      | 5.64       | 20 | 0.84              | 1.26               |
|                      | Qualifier    | 0.911            | 0.966      | 35 | $Y = (0.246228)X + (0.00427671)$   | 0.999991 | 3.74          | 12.5          |           |            |    |                   |                    |
| Azithromycin         | Quantitation | 2.777            | 0.243      | 36 | $Y = (8.14492)X + (0.0328438)$     | 0.999952 | 0.160         | 0.520         | 2.70      | 3.24       | 19 | 2.16              | 3.25               |
|                      | Qualifier    | 2.777            | 0.235      | 26 | $Y = (7.94994)X + (0.0420264)$     | 0.999863 | 0.170         | 0.580         |           |            |    |                   |                    |
| Bupropion            | Quantitation | 3.356            | 0.249      | 36 | $Y = (53.4663)X + (1.84361)$       | 0.999831 | 0.010         | 0.030         | 2.16      | 3.58       | 30 | 1.73              | 2.59               |
|                      | Qualifier    | 3.356            | 0.253      | 36 | $Y = (26.1419)X + (0.488269)$      | 0.999942 | 0.010         | 0.020         |           |            |    |                   |                    |
| Caffeine             | Quantitation | 2.473            | 0.121      | 36 | $Y = (2.26155)X + (0.0252275)$     | 0.999966 | 0.890         | 2.98          | 1.22      | 4.96       | 33 | 0.97              | 1.46               |
|                      | Qualifier    | 2.473            | 0.079      | 36 | $Y = (1.77883)X + (0.0352183)$     | 0.999940 | 0.190         | 0.650         |           |            |    |                   |                    |
| Carbamazepine        | Quantitation | 3.110            | 0.134      | 36 | $Y = (2.66887)X + (0.0835463)$     | 0.999968 | 0.010         | 0.050         | 4.16      | 2.16       | 27 | 3.33              | 4.99               |
|                      | Qualifier    | 3.110            | 0.115      | 36 | $Y = (0.617467)X + (0.0286352)$    | 0.999905 | 0.030         | 0.110         |           |            |    |                   |                    |
| Carboxybuprofen      | Quantitation | 2.905            | 8.194      | 35 | $Y = (1.20617)X + (-0.0157709)$    | 0.999517 | 0.810         | 2.45          | 1.4       | 1.95       | 28 | 1.1               | 1.7                |
|                      | Qualifier    | 2.875            | 9.158      | 36 | $Y = (0.842636)X + (-0.00953159)$  | 0.999375 | 1.05          | 3.17          |           |            |    |                   |                    |
| d-Cathine            | Quantitation | 3.251            | 0.077      | 36 | $Y = (13.3899)X + (-0.302528)$     | 0.999891 | 0.220         | 0.730         | 2.3       | 3.47       | 35 | 1.8               | 2.7                |
|                      | Qualifier    | 3.250            | 0.122      | 36 | $Y = (5.84737)X + (-0.114523)$     | 0.999908 | 0.240         | 0.790         |           |            |    |                   |                    |
| Chlorocycline        | Quantitation | 2.498            | 0.273      | 25 | $Y = (0.0481730)X + (-0.0419264)$  | 0.999303 | 1.09          | 3.63          | 1.17      | 4.58       | 11 | 0.94              | 1.40               |
|                      | Qualifier    | 2.484            | 1.220      | 30 | $Y = (0.0403372)X + (-0.0257034)$  | 0.999248 | 2.01          | 6.69          |           |            |    |                   |                    |
| Chlorpromazine       | Quantitation | 2.821            | 0.025      | 36 | $Y = (3.43548)X + (0.350571)$      | 0.999800 | 0.010         | 0.050         | 1.49      | 3.26       | 29 | 1.19              | 1.79               |
|                      | Qualifier    | 2.821            | 0.028      | 36 | $Y = (2.28472)X + (0.212035)$      | 0.999909 | 0.010         | 0.050         |           |            |    |                   |                    |

|                                  |              |       |       |    |                                    |          |       |       |       |      |    |      |       |
|----------------------------------|--------------|-------|-------|----|------------------------------------|----------|-------|-------|-------|------|----|------|-------|
| <b>Ciprofloxacin</b>             | Quantitation | 2.379 | 0.445 | 27 | $Y = (12.9303)X + (-0.0352396)$    | 0.999933 | 0.280 | 0.930 | 2.09  | 2.73 | 25 | 1.67 | 2.50  |
|                                  | Qualifier    | 2.379 | 0.301 | 36 | $Y = (6.70863)X + (-0.0485370)$    | 0.999952 | 0.180 | 0.610 |       |      |    |      |       |
| <b>Citalopram</b>                | Quantitation | 2.655 | 0.166 | 36 | $Y = (2.24008)X + (0.102021)$      | 0.999846 | 0.040 | 0.140 | 3.20  | 2.83 | 31 | 2.56 | 3.84  |
|                                  | Qualifier    | 2.655 | 0.165 | 36 | $Y = (0.690305)X + (0.0263768)$    | 0.999712 | 0.050 | 0.180 |       |      |    |      |       |
| <b>Clarithromycin</b>            | Quantitation | 2.777 | 0.200 | 27 | $Y = (34.8012)X + (0.167270)$      | 0.999909 | 0.010 | 0.030 | 3.05  | 2.29 | 25 | 2.44 | 3.66  |
|                                  | Qualifier    | 2.776 | 0.179 | 36 | $Y = (11.3813)X + (0.0418367)$     | 0.999865 | 0.040 | 0.130 |       |      |    |      |       |
| <b>Clobenzorex</b>               | Quantitation | 3.449 | 0.371 | 36 | $Y = (69.1496)X + (1.37955)$       | 0.999777 | 0.010 | 0.030 | 1.81  | 4.98 | 25 | 1.45 | 2.18  |
|                                  | Qualifier    | 3.449 | 0.383 | 36 | $Y = (35.6033)X + (1.37644)$       | 0.999751 | 0.010 | 0.020 |       |      |    |      |       |
| <b>Citalopram demethyl</b>       | Quantitation | 2.621 | 0.126 | 36 | $Y = (1.00555)X + (-0.196766)$     | 0.999427 | 1.21  | 4.04  | 2.82  | 3.37 | 25 | 2.26 | 3.39  |
|                                  | Qualifier    | 2.622 | 0.239 | 36 | $Y = (0.366526)X + (-0.0688258)$   | 0.999365 | 0.510 | 1.71  |       |      |    |      |       |
| <b>Citalopram didemethyl</b>     | Quantitation | 2.599 | 0.150 | 36 | $Y = (0.536276)X + (-0.179748)$    | 0.999600 | 3.40  | 11.3  | 1.6   | 3.49 | 28 | 1.3  | 1.9   |
|                                  | Qualifier    | 2.601 | 0.134 | 36 | $Y = (0.321850)X + (-0.0586333)$   | 0.999402 | 5.83  | 19.4  |       |      |    |      |       |
| <b>Citalopram N-oxide</b>        | Quantitation | 2.676 | 0.087 | 36 | $Y = (1.97530)X + (-0.234162)$     | 0.999786 | 0.780 | 2.61  | 1.38  | 3.94 | 27 | 1.11 | 1.66  |
|                                  | Qualifier    | 2.676 | 0.047 | 35 | $Y = (1.37189)X + (-0.0962831)$    | 0.999878 | 0.020 | 0.050 |       |      |    |      |       |
| <b>Citalopram propionic acid</b> | Quantitation | 4.286 | 0.347 | 36 | $Y = (0.584889)X + (0.00541258)$   | 0.999943 | 0.280 | 0.850 | 2.3   | 2.57 | 28 | 1.9  | 2.8   |
|                                  | Qualifier    | 4.284 | 0.437 | 36 | $Y = (0.250762)X + (0.00249637)$   | 0.999847 | 0.020 | 0.060 |       |      |    |      |       |
| <b>O-Desmethylvenlafaxine</b>    | Quantitation | 2.339 | 0.350 | 36 | $Y = (8.71572)X + (0.737690)$      | 0.999599 | 0.020 | 0.070 | 4.01  | 2.05 | 30 | 3.21 | 4.81  |
|                                  | Qualifier    | 2.339 | 0.410 | 36 | $Y = (2.11473)X + (0.218518)$      | 0.999224 | 0.080 | 0.260 |       |      |    |      |       |
| <b>Diazepam</b>                  | Quantitation | 3.529 | 0.128 | 36 | $Y = (2.94716)X + (0.0754380)$     | 0.999823 | 0.010 | 0.050 | 1.27  | 3.95 | 29 | 1.02 | 1.52  |
|                                  | Qualifier    | 3.528 | 0.133 | 36 | $Y = (2.51630)X + (0.0323572)$     | 0.999827 | 0.030 | 0.110 |       |      |    |      |       |
| <b>Diclofenac</b>                | Quantitation | 4.169 | 0.423 | 36 | $Y = (1.62888)X + (-0.00466846)$   | 0.999758 | 0.080 | 0.240 | 10.18 | 3.51 | 31 | 8.14 | 12.21 |
|                                  | Qualifier    | 4.171 | 0.533 | 35 | $Y = (0.155517)X + (-0.000301460)$ | 0.999947 | 0.110 | 0.330 |       |      |    |      |       |
| <b>Diltiazem</b>                 | Quantitation | 2.654 | 0.116 | 36 | $Y = (3.31104)X + (0.111262)$      | 0.999936 | 0.010 | 0.020 | 3.19  | 3.48 | 30 | 2.55 | 3.82  |
|                                  | Qualifier    | 2.653 | 0.122 | 36 | $Y = (1.07378)X + (0.0114945)$     | 0.999926 | 0.010 | 0.030 |       |      |    |      |       |
| <b>Doxycycline</b>               | Quantitation | 2.526 | 0.318 | 34 | $Y = (0.365737)X + (-0.338747)$    | 0.999551 | 1.66  | 5.54  | 5.21  | 3.65 | 19 | 4.17 | 6.25  |
|                                  | Qualifier    | 2.392 | 1.37  | 29 | $Y = (0.0725768)X + (-0.0635292)$  | 0.999452 | 1.75  | 5.84  |       |      |    |      |       |
| <b>Enrofloxacin</b>              | Quantitation | 2.406 | 0.283 | 36 | $Y = (12.4283)X + (0.000749846)$   | 0.999883 | 0.070 | 0.250 | 1.32  | 4.21 | 22 | 1.06 | 1.59  |
|                                  | Qualifier    | 2.403 | 0.335 | 27 | $Y = (8.89786)X + (0.0666777)$     | 0.999838 | 0.090 | 0.310 |       |      |    |      |       |
| <b>(+)-Ephedrine</b>             | Quantitation | 3.257 | 0.091 | 36 | $Y = (16.0764)X + (-0.0192273)$    | 0.999972 | 0.460 | 1.55  | 3.96  | 2.19 | 30 | 3.16 | 4.75  |
|                                  | Qualifier    | 3.257 | 0.085 | 36 | $Y = (4.08274)X + (-0.00595158)$   | 0.999996 | 0.030 | 0.090 |       |      |    |      |       |
| <b>10,11-Epoxy carbamazepine</b> | Quantitation | 2.899 | 0.109 | 36 | $Y = (1.50960)X + (0.104813)$      | 0.999803 | 0.010 | 0.020 | 1.09  | 2.03 | 30 | 0.87 | 1.31  |
|                                  | Qualifier    | 2.899 | 0.116 | 36 | $Y = (1.36043)X + (0.113039)$      | 0.999820 | 0.010 | 0.030 |       |      |    |      |       |
| <b>Erythromycin</b>              | Quantitation | 2.634 | 0.148 | 27 | $Y = (6.87316)X + (0.0784127)$     | 0.999876 | 0.020 | 0.070 | 2.69  | 3.79 | 26 | 2.15 | 3.23  |
|                                  | Qualifier    | 2.634 | 0.198 | 36 | $Y = (2.47205)X + (0.0396889)$     | 0.999864 | 0.030 | 0.100 |       |      |    |      |       |
| <b>Fenfluramine</b>              | Quantitation | 3.372 | 0.234 | 36 | $Y = (20.4009)X + (0.309775)$      | 0.999932 | 0.210 | 0.720 | 3.24  | 1.93 | 33 | 2.59 | 3.89  |
|                                  | Qualifier    | 3.372 | 0.259 | 36 | $Y = (6.34855)X + (0.0792328)$     | 0.999956 | 0.020 | 0.070 |       |      |    |      |       |

|                            |              |       |       |    |                                     |          |       |       |               |      |    |       |       |
|----------------------------|--------------|-------|-------|----|-------------------------------------|----------|-------|-------|---------------|------|----|-------|-------|
| <b>Fenofibrate</b>         | Quantitation | 4.450 | 0.106 | 35 | $Y = (0.167823)X + (-0.0254142)$    | 0.999681 | 1.67  | 5.58  | 1.15          | 3.42 | 25 | 0.92  | 1.38  |
|                            | Qualifier    | 4.453 | 0.246 | 35 | $Y = (0.144540)X + (-0.0199009)$    | 0.999565 | 2.08  | 6.92  |               |      |    |       |       |
| <b>Fentermine</b>          | Quantitation | 3.257 | 0.080 | 36 | $Y = (35.7513)X + (0.116920)$       | 0.999952 | 0.010 | 0.040 | 16.96         | 4.17 | 23 | 13.57 | 20.36 |
|                            | Qualifier    | 3.255 | 0.146 | 36 | $Y = (2.21057)X + (-0.0196968)$     | 0.999921 | 0.190 | 0.630 |               |      |    |       |       |
| <b>Fluoxetine</b>          | Quantitation | 2.804 | 0.151 | 36 | $Y = (3.40022)X + (-0.0761480)$     | 0.999963 | 0.020 | 0.070 | 54.1          | 2.45 | 25 | 43.3  | 64.9  |
|                            | Qualifier    | 2.804 | 0.189 | 32 | $Y = (0.0619889)X + (-0.000721706)$ | 0.999934 | 0.310 | 1.04  |               |      |    |       |       |
| <b>Gemfibrozil</b>         | Quantitation | 5.677 | 0.408 | 36 | $Y = (1.15599)X + (0.000273772)$    | 0.999984 | 0.080 | 0.260 | 52.36         | 2.07 | 20 | 41.89 | 62.83 |
|                            | Qualifier    | 5.670 | 0.398 | 32 | $Y = (0.0225317)X + (-0.000253063)$ | 0.999965 | 0.120 | 0.370 |               |      |    |       |       |
| <b>2-Hydroxyibuprofen</b>  | Quantitation | 3.012 | 6.122 | 34 | $Y = (1.07445)X + (-0.0228344)$     | 0.999507 | 1.62  | 4.92  | <b>Note 1</b> |      |    |       |       |
| <b>Ibuprofen</b>           | Quantitation | 4.307 | 0.220 | 36 | $Y = (0.736439)X + (-0.000436140)$  | 0.999915 | 0.150 | 0.450 | <b>Note 1</b> |      |    |       |       |
| <b>Ketoprofen</b>          | Quantitation | 3.890 | 0.309 | 36 | $Y = (2.18857)X + (-0.00732679)$    | 0.999960 | 0.160 | 0.490 | <b>Note 1</b> |      |    |       |       |
| <b>Lanzoprazole</b>        | Quantitation | 2.838 | 0.060 | 36 | $Y = (0.917109)X + (0.100898)$      | 0.999684 | 0.010 | 0.020 | 2.89          | 3.07 | 23 | 2.32  | 3.47  |
|                            | Qualifier    | 2.838 | 0.091 | 36 | $Y = (0.332633)X + (0.0221102)$     | 0.999823 | 0.030 | 0.100 |               |      |    |       |       |
| <b>Lomefloxacin</b>        | Quantitation | 2.391 | 0.336 | 32 | $Y = (3.10848)X + (0.0385129)$      | 0.999813 | 0.120 | 0.410 | 1.22          | 3.95 | 15 | 0.98  | 1.47  |
|                            | Qualifier    | 2.391 | 0.774 | 23 | $Y = (2.54572)X + (0.00724765)$     | 0.999650 | 0.250 | 0.820 |               |      |    |       |       |
| <b>Lorazepam</b>           | Quantitation | 3.554 | 0.084 | 36 | $Y = (3.01194)X + (-0.0652863)$     | 0.999869 | 0.010 | 0.040 | 2.24          | 2.73 | 25 | 1.79  | 2.69  |
|                            | Qualifier    | 3.555 | 0.397 | 36 | $Y = (1.37350)X + (-0.0339598)$     | 0.999791 | 0.700 | 2.35  |               |      |    |       |       |
| <b>Mazindol</b>            | Quantitation | 3.356 | 0.227 | 36 | $Y = (36.9371)X + (3.73131)$        | 0.999742 | 0.010 | 0.040 | Note 1        |      |    |       |       |
| <b>Metformin</b>           | Quantitation | 0.660 | 1.27  | 36 | $Y = (0.321469)X + (-0.00730507)$   | 0.999958 | 0.140 | 0.470 | 1.21          | 2.95 | 24 | 0.97  | 1.45  |
|                            | Qualifier    | 0.661 | 1.51  | 24 | $Y = (0.270374)X + (-0.0108923)$    | 0.999958 | 0.130 | 0.440 |               |      |    |       |       |
| <b>d,l-Methamphetamine</b> | Quantitation | 3.257 | 0.099 | 36 | $Y = (13.4285)X + (0.128715)$       | 0.999892 | 0.110 | 0.380 | 4.90          | 2.99 | 31 | 3.92  | 5.88  |
|                            | Qualifier    | 3.258 | 0.174 | 36 | $Y = (2.75210)X + (0.00866900)$     | 0.999993 | 0.010 | 0.040 |               |      |    |       |       |
| <b>Moxifloxacin</b>        | Quantitation | 2.469 | 0.250 | 27 | $Y = (9.64109)X + (-0.290050)$      | 0.999598 | 0.110 | 0.360 | 3.30          | 3.41 | 19 | 2.64  | 3.97  |
|                            | Qualifier    | 2.469 | 0.334 | 36 | $Y = (2.86333)X + (-0.0623552)$     | 0.999574 | 0.140 | 0.450 |               |      |    |       |       |
| <b>Naproxen</b>            | Quantitation | 3.948 | 0.303 | 36 | $Y = (1.09789)X + (-0.00144390)$    | 0.999853 | 0.010 | 0.030 | 1.84          | 3.74 | 32 | 1.47  | 2.21  |
|                            | Qualifier    | 3.946 | 0.220 | 36 | $Y = (0.608148)X + (-0.000377853)$  | 0.999735 | 0.020 | 0.050 |               |      |    |       |       |
| <b>Nimesulide</b>          | Quantitation | 4.133 | 0.133 | 36 | $Y = (4.48427)X + (-0.0139536)$     | 0.999888 | 0.020 | 0.060 | 8.82          | 0.97 | 24 | 7.06  | 10.59 |
|                            | Qualifier    | 4.136 | 0.603 | 36 | $Y = (0.507141)X + (-0.00109917)$   | 0.999952 | 0.030 | 0.090 |               |      |    |       |       |
| <b>d,l-Norephedrine</b>    | Quantitation | 3.251 | 0.082 | 36 | $Y = (5.07146)X + (-0.0480787)$     | 0.999980 | 0.260 | 0.870 | 2.10          | 2.96 | 30 | 1.68  | 2.52  |
|                            | Qualifier    | 3.250 | 0.123 | 36 | $Y = (2.47466)X + (-0.0307268)$     | 0.999985 | 0.230 | 0.770 |               |      |    |       |       |
| <b>Norfloxacin</b>         | Quantitation | 2.375 | 1.23  | 27 | $Y = (10.6605)X + (-0.157677)$      | 0.999798 | 1.60  | 5.34  | 5.84          | 2.25 | 17 | 4.67  | 7.01  |
|                            | Qualifier    | 2.370 | 0.430 | 31 | $Y = (1.91040)X + (-0.0472131)$     | 0.999629 | 0.700 | 2.32  |               |      |    |       |       |
| <b>Norfluoxetine</b>       | Quantitation | 2.778 | 0.212 | 36 | $Y = (0.197050)X + (-0.00653015)$   | 0.999554 | 0.090 | 0.310 | 1.09          | 3.90 | 29 | 0.87  | 1.31  |
|                            | Qualifier    | 2.778 | 0.213 | 35 | $Y = (0.175225)X + (-0.00339312)$   | 0.999865 | 0.130 | 0.430 |               |      |    |       |       |
| <b>Norserttraline</b>      | Quantitation | 2.801 | 0.493 | 36 | $Y = (0.124385)X + (0.00244630)$    | 0.999969 | 5.33  | 17.8  | 1.39          | 3.24 | 19 | 1.11  | 1.67  |
|                            | Qualifier    | 2.803 | 0.735 | 34 | $Y = (0.0883889)X + (-0.00587728)$  | 0.999715 | 3.04  | 10.1  |               |      |    |       |       |



|                        |              |       |       |    |                                    |          |       |       |        |      |    |      |       |
|------------------------|--------------|-------|-------|----|------------------------------------|----------|-------|-------|--------|------|----|------|-------|
| Ofloxacin              | Quantitation | 2.371 | 0.276 | 27 | Y = (17.1323)X + (0.185203)        | 0.999869 | 0.180 | 0.620 | 1.29   | 4.44 | 26 | 1.03 | 1.55  |
|                        | Qualifier    | 2.371 | 0.275 | 36 | Y = (13.5243)X + (0.0635528)       | 0.999905 | 0.040 | 0.140 |        |      |    |      |       |
| Oxytetracycline        | Quantitation | 2.357 | 0.198 | 24 | Y = (0.0419188)X + (-0.0469376)    | 0.999598 | 1.25  | 4.15  | 2.48   | 3.10 | 13 | 1.98 | 2.98  |
|                        | Qualifier    | 2.360 | 0.704 | 25 | Y = (0.0182545)X + (-0.0205711)    | 0.999498 | 13.69 | 45.6  |        |      |    |      |       |
| Paroxetine             | Quantitation | 2.717 | 0.149 | 36 | Y = (0.910500)X + (-0.130027)      | 0.999670 | 0.410 | 1.370 | 1.39   | 2.87 | 29 | 1.11 | 1.67  |
|                        | Qualifier    | 2.717 | 0.152 | 36 | Y = (0.644454)X + (-0.0992948)     | 0.999683 | 0.150 | 0.500 |        |      |    |      |       |
| Phenolphthalein        | Quantitation | 4.531 | 0.240 | 36 | Y = (3.54539)X + (0.196511)        | 0.999736 | 0.010 | 0.030 | 5.11   | 1.25 | 25 | 4.09 | 6.57  |
|                        | Qualifier    | 4.529 | 0.277 | 36 | Y = (0.680798)X + (0.0498404)      | 0.999505 | 0.040 | 0.120 |        |      |    |      |       |
| Pravastatin            | Quantitation | 3.535 | 0.667 | 33 | Y = (0.0492404)X + (-8.75910e-005) | 0.999971 | 0.070 | 0.210 | 1.15   | 2.71 | 23 | 0.92 | 1.38  |
|                        | Qualifier    | 3.530 | 0.932 | 35 | Y = (0.0432767)X + (0.000122420)   | 0.999875 | 0.030 | 0.080 |        |      |    |      |       |
| Propanolol             | Quantitation | 2.632 | 0.337 | 36 | Y = (0.729575)X + (-0.0566092)     | 0.999881 | 2.11  | 7.03  | Note 1 |      |    |      |       |
| Prulifloxacin          | Quantitation | 2.741 | 0.219 | 27 | Y = (8.79816)X + (-0.0517378)      | 0.999910 | 0.090 | 0.280 | 1.18   | 3.55 | 26 | 0.94 | 1.41  |
|                        | Qualifier    | 2.739 | 0.145 | 36 | Y = (7.19572)X + (0.0152447)       | 0.999838 | 0.080 | 0.270 |        |      |    |      |       |
| Rimonabant             | Quantitation | 4.337 | 0.146 | 36 | Y = (12.1388)X + (4.94926)         | 0.999782 | 0.010 | 0.020 | 4.70   | 2.10 | 30 | 3.76 | 5.64  |
|                        | Qualifier    | 4.336 | 0.138 | 36 | Y = (2.66341)X + (1.05284)         | 0.999562 | 0.010 | 0.040 |        |      |    |      |       |
| Salicylic acid         | Quantitation | 1.601 | 4.14  | 36 | Y = (0.508232)X + (-0.0217815)     | 0.999766 | 3.63  | 11.0  | 9.74   | 3.61 | 23 | 7.79 | 11.69 |
|                        | Qualifier    | 1.612 | 3.26  | 36 | Y = (0.0539851)X + (-0.00165165)   | 0.999944 | 8.44  | 25.6  |        |      |    |      |       |
| Sertraline             | Quantitation | 2.822 | 0.199 | 36 | Y = (1.36293)X + (-0.0902651)      | 0.999891 | 0.080 | 0.260 | 1.41   | 2.82 | 23 | 1.13 | 1.69  |
|                        | Qualifier    | 2.823 | 0.242 | 36 | Y = (0.993422)X + (-0.0739301)     | 0.999911 | 0.080 | 0.250 |        |      |    |      |       |
| Sibutramine            | Quantitation | 3.721 | 1.58  | 30 | Y = (75.2990)X + (-2.91407)        | 0.999800 | 0.190 | 0.650 | 2.09   | 3.17 | 27 | 1.67 | 2.50  |
|                        | Qualifier    | 3.735 | 1.76  | 34 | Y = (36.4190)X + (-1.20229)        | 0.999871 | 0.210 | 0.690 |        |      |    |      |       |
| Simvastatin            | Quantitation | 4.259 | 0.058 | 35 | Y = (0.285996)X + (-0.0157286)     | 0.999913 | 0.040 | 0.120 | 1.22   | 3.33 | 29 | 0.97 | 1.46  |
|                        | Qualifier    | 4.259 | 0.035 | 36 | Y = (0.232151)X + (-0.0125086)     | 0.999958 | 0.050 | 0.170 |        |      |    |      |       |
| Sulfadiazine           | Quantitation | 2.554 | 0.262 | 27 | Y = (14.6384)X + (0.110844)        | 0.999732 | 0.030 | 0.110 | 1.26   | 2.01 | 24 | 1.01 | 1.51  |
|                        | Qualifier    | 2.553 | 0.245 | 35 | Y = (11.4754)X + (0.0602667)       | 0.999814 | 0.100 | 0.340 |        |      |    |      |       |
| Sulfadimethoxine       | Quantitation | 3.008 | 0.186 | 27 | Y = (41.4033)X + (-0.591546)       | 0.999833 | 0.080 | 0.270 | 2.03   | 2.98 | 25 | 1.62 | 2.43  |
|                        | Qualifier    | 3.010 | 0.574 | 36 | Y = (21.0089)X + (-0.323471)       | 0.999823 | 0.370 | 1.23  |        |      |    |      |       |
| Sulfamethazine         | Quantitation | 2.702 | 0.167 | 27 | Y = (23.5234)X + (0.301930)        | 0.999731 | 0.000 | 0.000 | 1.43   | 3.11 | 27 | 1.15 | 1.72  |
|                        | Qualifier    | 2.702 | 0.201 | 36 | Y = (15.2144)X + (0.316772)        | 0.999689 | 0.010 | 0.020 |        |      |    |      |       |
| Sulfamethizole         | Quantitation | 2.666 | 0.051 | 36 | Y = (32.8790)X + (-0.0905455)      | 0.999945 | 0.040 | 0.130 | 1.93   | 4.46 | 25 | 1.54 | 2.31  |
|                        | Qualifier    | 2.666 | 0.087 | 36 | Y = (16.9662)X + (0.0469254)       | 0.999986 | 0.020 | 0.050 |        |      |    |      |       |
| Sulfamethoxazole       | Quantitation | 2.891 | 0.153 | 27 | Y = (18.3074)X + (0.0322277)       | 0.999946 | 0.020 | 0.060 | 1.20   | 2.96 | 30 | 0.96 | 1.43  |
|                        | Qualifier    | 2.890 | 0.134 | 36 | Y = (15.7580)X + (-0.0672412)      | 0.999911 | 0.040 | 0.120 |        |      |    |      |       |
| Sulfamethoxypyridazine | Quantitation | 2.695 | 0.201 | 27 | Y = (29.2260)X + (0.187498)        | 0.999761 | 0.020 | 0.080 | 1.15   | 2.73 | 24 | 0.92 | 1.38  |
|                        | Qualifier    | 2.694 | 0.188 | 36 | Y = (24.3340)X + (0.263906)        | 0.999899 | 0.020 | 0.080 |        |      |    |      |       |
| Sulfapyridine          | Quantitation | 2.581 | 0.249 | 27 | Y = (18.5438)X + (-0.142218)       | 0.999905 | 0.180 | 0.610 | 1.31   | 3.18 | 28 | 1.04 | 1.57  |

|                  |              |       |       |    |                                      |          |       |       |      |      |    |      |      |
|------------------|--------------|-------|-------|----|--------------------------------------|----------|-------|-------|------|------|----|------|------|
|                  | Qualifier    | 2.582 | 0.244 | 36 | $Y = (13.1512)X + (-0.00755633)$     | 0.999730 | 0.060 | 0.190 |      |      |    |      |      |
| Sulfaquinoxaline | Quantitation | 2.995 | 0.049 | 36 | $Y = (33.1310)X + (-0.231374)$       | 0.999877 | 0.080 | 0.270 | 1.56 | 3.82 | 27 | 1.25 | 1.88 |
|                  | Qualifier    | 2.996 | 0.146 | 36 | $Y = (21.7703)X + (-0.153190)$       | 0.999921 | 0.060 | 0.190 |      |      |    |      |      |
| Sulfaquinoxaline | Quantitation | 4.004 | 0.319 | 34 | $Y = (0.0867622)X + (0.00123453)$    | 0.999863 | 0.050 | 0.160 | 2.49 | 3.27 | 22 | 1.99 | 2.98 |
|                  | Qualifier    | 3.998 | 0.728 | 31 | $Y = (0.0368467)X + (-1.75817e-005)$ | 0.999959 | 0.100 | 0.300 |      |      |    |      |      |
| Sulfathiazole    | Quantitation | 2.511 | 0.083 | 36 | $Y = (25.3266)X + (-0.0420419)$      | 0.999982 | 0.040 | 0.120 | 1.74 | 3.92 | 26 | 1.40 | 2.09 |
|                  | Qualifier    | 2.511 | 0.118 | 35 | $Y = (14.5806)X + (0.0595692)$       | 0.999922 | 0.030 | 0.100 |      |      |    |      |      |
| Synephrine       | Quantitation | 1.294 | 0.423 | 36 | $Y = (9.89755)X + (-0.0989919)$      | 0.999852 | 0.750 | 2.50  | 4.45 | 2.53 | 28 | 3.56 | 5.34 |
|                  | Qualifier    | 1.293 | 0.413 | 36 | $Y = (2.21955)X + (-0.0240835)$      | 0.999880 | 0.520 | 1.72  |      |      |    |      |      |
| Tetracycline     | Quantitation | 2.384 | 0.170 | 27 | $Y = (0.246994)X + (-0.232154)$      | 0.999694 | 0.350 | 1.16  | 2.00 | 3.59 | 14 | 1.60 | 2.41 |
|                  | Qualifier    | 2.392 | 1.271 | 28 | $Y = (0.122908)X + (-0.113980)$      | 0.999302 | 5.16  | 17.2  |      |      |    |      |      |
| Topiramate       | Quantitation | 4.229 | 0.261 | 36 | $Y = (2.31447)X + (0.000881671)$     | 0.999995 | 0.020 | 0.050 | 5.54 | 3.13 | 18 | 4.43 | 6.65 |
|                  | Qualifier    | 4.228 | 0.312 | 33 | $Y = (0.431505)X + (-0.0113229)$     | 0.999958 | 1.52  | 4.61  |      |      |    |      |      |
| Trazodone        | Quantitation | 2.546 | 0.174 | 36 | $Y = (1.03567)X + (-0.0195913)$      | 0.999972 | 0.040 | 0.130 | 1.22 | 2.43 | 29 | 0.98 | 1.47 |
|                  | Qualifier    | 2.546 | 0.160 | 36 | $Y = (0.833718)X + (-0.00775081)$    | 0.999959 | 0.270 | 0.910 |      |      |    |      |      |
| Trimethoprim     | Quantitation | 2.366 | 0.291 | 26 | $Y = (5.88940)X + (0.0307121)$       | 0.999960 | 0.130 | 0.430 | 1.06 | 3.30 | 24 | 0.85 | 1.28 |
|                  | Qualifier    | 2.367 | 0.399 | 36 | $Y = (6.86695)X + (-0.0650998)$      | 0.999638 | 4.17  | 13.9  |      |      |    |      |      |
| Venlafaxine      | Quantitation | 2.518 | 0.173 | 36 | $Y = (13.6715)X + (1.17294)$         | 0.999661 | 0.010 | 0.030 | 4.84 | 1.78 | 24 | 3.87 | 5.81 |
|                  | Qualifier    | 2.518 | 0.194 | 36 | $Y = (2.82840)X + (0.267302)$        | 0.999668 | 0.030 | 0.100 |      |      |    |      |      |
| Zonisamide       | Quantitation | 3.733 | 0.496 | 36 | $Y = (1.64794)X + (0.0382692)$       | 0.999924 | 0.170 | 0.500 | 1.81 | 2.61 | 27 | 1.45 | 2.17 |
|                  | Qualifier    | 3.736 | 0.426 | 36 | $Y = (0.912682)X + (0.0214751)$      | 0.999876 | 0.330 | 1.01  |      |      |    |      |      |

Pharmaceuticals organized in the table by alphabetic order

**Note 1:** Only one transition could be recorded due to their poor fragmentation

**Table S8.** Retention time, regression, detection and quantitation limits for each transition and ion ratio for each pesticide.

| Pesticides            | MRM          | Retention time   |            |    | Regression                         |         | LOD<br>(µg/L) | LOQ<br>(µg/L) | Ion Ratio |            |    |                   |                    |
|-----------------------|--------------|------------------|------------|----|------------------------------------|---------|---------------|---------------|-----------|------------|----|-------------------|--------------------|
|                       |              | Average<br>(min) | RSD<br>(%) | n  | Equation                           | R       |               |               | Average   | RSD<br>(%) | n  | -20%<br>Ion ratio | + 20%<br>Ion ratio |
| Alachlor              | Quantitation | 4.613            | 0.25       | 36 | $Y = (5.78558)X + (0.0209059)$     | 0.99988 | 0.010         | 0.030         | 3.19      | 3.34       | 29 | 2.55              | 3.83               |
|                       | Qualifier    | 4.599            | 0.28       | 36 | $Y = (1.77551)X + (0.00657384)$    | 0.99985 | 0.140         | 0.440         |           |            |    |                   |                    |
| Ametryn               | Quantitation | 3.797            | 0.04       | 36 | $Y = (51.8106)X + (0.390445)$      | 0.99953 | 0.010         | 0.030         | 2.16      | 4.11       | 17 | 1.73              | 2.60               |
|                       | Qualifier    | 3.797            | 0.05       | 36 | $Y = (18.5654)X + (0.650880)$      | 0.99933 | 0.010         | 0.020         |           |            |    |                   |                    |
| Asulam                | Quantitation | 3.322            | 0.10       | 35 | $Y = (1.57017)X + (0.0105356)$     | 0.99978 | 0.030         | 0.080         | 1.32      | 2.58       | 22 | 1.06              | 1.58               |
|                       | Qualifier    | 3.322            | 0.08       | 33 | $Y = (1.13570)X + (0.0231755)$     | 0.99971 | 0.010         | 0.050         |           |            |    |                   |                    |
| Atrazine              | Quantitation | 4.087            | 0.05       | 36 | $Y = (24.5233)X + (0.0192450)$     | 0.99983 | 0.020         | 0.070         | 2.01      | 4.07       | 23 | 1.61              | 2.41               |
|                       | Qualifier    | 4.087            | 0.04       | 36 | $Y = (11.5877)X + (0.00943163)$    | 0.99985 | 0.070         | 0.200         |           |            |    |                   |                    |
| Atrazine-desethyl     | Quantitation | 3.516            | 0.09       | 36 | $Y = (4.72043)X + (-0.00217138)$   | 0.99988 | 0.340         | 1.03          | 1.63      | 4.08       | 21 | 1.30              | 1.95               |
|                       | Qualifier    | 3.516            | 0.14       | 36 | $Y = (2.83014)X + (0.00114037)$    | 0.99989 | 0.060         | 0.190         |           |            |    |                   |                    |
| Atrazine-desisopropyl | Quantitation | 3.303            | 0.25       | 34 | $Y = (0.810192)X + (0.000961784)$  | 0.99977 | 1.36          | 4.13          | 1.12      | 4.72       | 20 | 0.89              | 1.34               |
|                       | Qualifier    | 3.301            | 0.07       | 31 | $Y = (0.778505)X + (-0.000709147)$ | 0.99967 | 0.570         | 1.73          |           |            |    |                   |                    |
| Azinphos-methyl       | Quantitation | 4.298            | 0.08       | 35 | $Y = (3.94537)X + (-0.000994027)$  | 0.99997 | 0.010         | 0.030         | 1.81      | 4.10       | 12 | 1.45              | 2.17               |
|                       | Qualifier    | 4.299            | 0.07       | 36 | $Y = (2.22658)X + (-0.00130689)$   | 0.99977 | 0.130         | 0.390         |           |            |    |                   |                    |
| Azoxystrobin          | Quantitation | 4.312            | 0.04       | 36 | $Y = (22.3020)X + (0.0291066)$     | 0.99954 | 0.020         | 0.060         | 5.96      | 3.26       | 19 | 4.77              | 7.16               |
|                       | Qualifier    | 4.312            | 0.08       | 36 | $Y = (3.61539)X + (0.00416409)$    | 0.99953 | 0.030         | 0.080         |           |            |    |                   |                    |
| Bensulfuron-methyl    | Quantitation | 4.077            | 0.05       | 36 | $Y = (20.1308)X + (0.0110967)$     | 0.99973 | 0.020         | 0.070         | 2.45      | 3.62       | 26 | 1.96              | 2.94               |
|                       | Qualifier    | 4.076            | 0.05       | 36 | $Y = (7.87768)X + (0.0100038)$     | 0.99931 | 0.010         | 0.030         |           |            |    |                   |                    |
| Bentazon              | Quantitation | 4.020            | 0.09       | 33 | $Y = (0.691212)X + (0.0127226)$    | 0.99964 | 0.250         | 0.750         | 2.26      | 2.73       | 18 | 1.81              | 2.71               |
|                       | Qualifier    | 4.021            | 0.10       | 32 | $Y = (0.307405)X + (0.00367799)$   | 0.99977 | 0.140         | 0.440         |           |            |    |                   |                    |
| Carbaryl              | Quantitation | 4.010            | 0.08       | 33 | $Y = (1.04334)X + (0.00123476)$    | 0.99982 | 0.660         | 1.99          | 2.68      | 3.27       | 17 | 2.14              | 3.22               |
|                       | Qualifier    | 4.011            | 0.09       | 31 | $Y = (0.354998)X + (0.00002859)$   | 0.99951 | 1.37          | 4.14          |           |            |    |                   |                    |
| Carbofuran            | Quantitation | 3.947            | 0.05       | 36 | $Y = (16.2178)X + (0.121797)$      | 0.99975 | 0.060         | 0.190         | 0.99      | 3.66       | 35 | 0.79              | 1.19               |
|                       | Qualifier    | 3.946            | 0.03       | 36 | $Y = (16.1885)X + (0.127057)$      | 0.99967 | 0.070         | 0.210         |           |            |    |                   |                    |
| Chlorfenvinphos       | Quantitation | 4.634            | 0.12       | 33 | $Y = (1.30320)X + (0.000694796)$   | 0.99988 | 0.120         | 0.370         | 1.46      | 5.95       | 10 | 1.17              | 1.75               |
|                       | Qualifier    | 4.632            | 0.07       | 31 | $Y = (0.778240)X + (-0.000135808)$ | 0.99964 | 0.230         | 0.690         |           |            |    |                   |                    |
| Chlortoluron          | Quantitation | 3.997            | 0.05       | 36 | $Y = (26.9005)X + (0.00201672)$    | 0.99990 | 0.130         | 0.400         | 0.98      | 4.75       | 24 | 0.78              | 1.17               |

|                              |              |       |      |    |                                    |         |       |       |               |      |    |      |      |
|------------------------------|--------------|-------|------|----|------------------------------------|---------|-------|-------|---------------|------|----|------|------|
|                              | Qualifier    | 3.996 | 0.06 | 36 | $Y = (28.4796)X + (0.0173369)$     | 0.99966 | 0.010 | 0.030 |               |      |    |      |      |
| <b>Chlorpropham</b>          | Quantitation | 3.996 | 0.07 | 36 | $Y = (14.4548)X + (-0.00342676)$   | 0.99944 | 0.160 | 0.490 | 1.03          | 2.97 | 29 | 0.83 | 1.24 |
|                              | Qualifier    | 3.996 | 0.06 | 36 | $Y = (13.7213)X + (0.00239978)$    | 0.99986 | 0.130 | 0.400 |               |      |    |      |      |
| <b>Dimethoate</b>            | Quantitation | 3.539 | 0.06 | 36 | $Y = (5.30546)X + (0.0170082)$     | 0.99980 | 0.210 | 0.640 | 1.09          | 4.62 | 17 | 0.87 | 1.31 |
|                              | Qualifier    | 3.538 | 0.09 | 35 | $Y = (4.69111)X + (0.0110004)$     | 0.99992 | 0.230 | 0.700 |               |      |    |      |      |
| <b>Diuron</b>                | Quantitation | 4.089 | 0.04 | 36 | $Y = (2.46995)X + (0.00273755)$    | 0.99978 | 0.130 | 0.390 | 1.88          | 4.70 | 13 | 1.50 | 2.25 |
|                              | Qualifier    | 4.084 | 0.38 | 36 | $Y = (1.29231)X + (0.00158067)$    | 0.99961 | 0.090 | 0.270 |               |      |    |      |      |
| <b>Imidacloprid</b>          | Quantitation | 3.508 | 0.12 | 33 | $Y = (0.675452)X + (0.000277841)$  | 0.99973 | 0.160 | 0.500 | 1.86          | 4.63 | 13 | 1.48 | 2.23 |
|                              | Qualifier    | 3.508 | 0.18 | 32 | $Y = (0.306183)X + (0.00158253)$   | 0.99984 | 0.100 | 0.300 |               |      |    |      |      |
| <b>Isoproturon</b>           | Quantitation | 4.048 | 0.04 | 36 | $Y = (46.2430)X + (0.0821940)$     | 0.99915 | 0.030 | 0.090 | 1.18          | 3.06 | 32 | 0.95 | 1.42 |
|                              | Qualifier    | 4.048 | 0.04 | 36 | $Y = (39.9800)X + (0.0490080)$     | 0.99939 | 0.010 | 0.020 |               |      |    |      |      |
| <b>Linuron</b>               | Quantitation | 4.047 | 0.25 | 36 | $Y = (0.578734)X + (0.00104172)$   | 0.99973 | 1.28  | 3.87  | 1.81          | 2.70 | 13 | 1.45 | 2.17 |
|                              | Qualifier    | 4.356 | 0.10 | 33 | $Y = (0.190125)X + (0.00194087)$   | 0.99978 | 0.130 | 0.390 |               |      |    |      |      |
| <b>Melathion</b>             | Quantitation | 4.487 | 0.12 | 23 | $Y = (0.0747668)X + (-0.00185515)$ | 0.99975 | 2.23  | 6.75  | 1.37          | 3.59 | 12 | 1.10 | 1.64 |
|                              | Qualifier    | 4.484 | 0.08 | 21 | $Y = (0.0544132)X + (0.000586693)$ | 0.99972 | 0.920 | 2.780 |               |      |    |      |      |
| <b>Metolachlor</b>           | Quantitation | 4.638 | 0.06 | 36 | $Y = (11.4398)X + (0.0213983)$     | 0.99990 | 0.040 | 0.130 | 1.45          | 7.38 | 7  | 1.16 | 1.74 |
|                              | Qualifier    | 4.638 | 0.04 | 36 | $Y = (13.5063)X + (0.00850926)$    | 0.99979 | 0.090 | 0.270 |               |      |    |      |      |
| <b>Metalaxyl</b>             | Quantitation | 4.088 | 0.39 | 36 | $Y = (2.76686)X + (-0.00134179)$   | 0.99990 | 0.290 | 0.880 | <b>Note 1</b> |      |    |      |      |
| <b>Methiocarb</b>            | Quantitation | 4.303 | 0.06 | 35 | $Y = (2.42204)X + (-0.00137898)$   | 0.99975 | 0.270 | 0.820 | 0.97          | 4.02 | 22 | 0.78 | 1.17 |
|                              | Qualifier    | 4.304 | 0.18 | 36 | $Y = (2.50719)X + (0.00305352)$    | 0.99971 | 0.560 | 1.680 |               |      |    |      |      |
| <b>Methiocarbe sulfone</b>   | Quantitation | 3.339 | 0.06 | 36 | $Y = (20.7890)X + (0.00962249)$    | 0.99971 | 0.570 | 1.720 | 1.78          | 2.90 | 29 | 1.42 | 2.13 |
|                              | Qualifier    | 3.339 | 0.06 | 36 | $Y = (11.3291)X + (0.00516808)$    | 0.99981 | 0.010 | 0.040 |               |      |    |      |      |
| <b>Methiocarbe sulfoxide</b> | Quantitation | 3.340 | 0.10 | 36 | $Y = (4.09666)X + (0.00334794)$    | 0.99960 | 0.010 | 0.020 | 3.54          | 4.44 | 17 | 2.83 | 4.24 |
|                              | Qualifier    | 3.339 | 0.09 | 33 | $Y = (1.05599)X + (0.000520520)$   | 0.99972 | 0.010 | 0.020 |               |      |    |      |      |
| <b>Metobromuron</b>          | Quantitation | 4.148 | 0.42 | 33 | $Y = (0.630688)X + (0.00555753)$   | 0.99967 | 0.050 | 0.160 | 1.14          | 3.93 | 22 | 0.91 | 1.36 |
|                              | Qualifier    | 4.151 | 0.07 | 30 | $Y = (0.569507)X + (0.00827548)$   | 0.99978 | 0.140 | 0.430 |               |      |    |      |      |
| <b>Monolinuron</b>           | Quantitation | 4.088 | 0.07 | 36 | $Y = (3.52220)X + (-0.000878116)$  | 0.99998 | 0.050 | 0.140 | 2.43          | 5.74 | 14 | 1.94 | 2.91 |
|                              | Qualifier    | 4.088 | 0.07 | 33 | $Y = (1.56850)X + (0.00160774)$    | 0.99938 | 0.010 | 0.020 |               |      |    |      |      |
| <b>Pirimicarb</b>            | Quantitation | 3.296 | 0.05 | 36 | $Y = (84.1353)X + (-0.0630855)$    | 0.99974 | 0.110 | 0.320 | 2.33          | 2.59 | 36 | 1.86 | 2.80 |
|                              | Qualifier    | 3.296 | 0.05 | 36 | $Y = (37.4754)X + (-0.0245084)$    | 0.99988 | 0.040 | 0.120 |               |      |    |      |      |
| <b>Propoxur</b>              | Quantitation | 3.930 | 0.05 | 36 | $Y = (37.6386)X + (0.0198632)$     | 0.99971 | 0.010 | 0.030 | 2.22          | 2.51 | 24 | 1.77 | 2.66 |
|                              | Qualifier    | 3.930 | 0.08 | 36 | $Y = (18.3003)X + (-0.0128080)$    | 0.99988 | 0.060 | 0.180 |               |      |    |      |      |
| <b>Pyrimethanil</b>          | Quantitation | 4.136 | 0.04 | 36 | $Y = (47.8849)X + (-0.0259311)$    | 0.99976 | 0.030 | 0.100 | 1.33          | 4.53 | 30 | 1.06 | 1.59 |

|               |              |       |      |    |                                   |         |   |       |       |       |      |    |       |       |
|---------------|--------------|-------|------|----|-----------------------------------|---------|---|-------|-------|-------|------|----|-------|-------|
|               | Qualifier    | 4.135 | 0.05 | 36 | $Y = (35.5058)X + (0.00724680)$   | 0.99985 | — | 0.020 | 0.050 |       |      |    |       |       |
| Terbutylazine | Quantitation | 4.368 | 0.03 | 36 | $Y = (192.541)X + (0.164482)$     | 0.99972 |   | 0.030 | 0.080 | 6.83  | 3.84 | 28 | 5.46  | 8.19  |
|               | Qualifier    | 4.368 | 0.04 | 36 | $Y = (27.2459)X + (0.0325320)$    | 0.99989 |   | 0.050 | 0.150 |       |      |    |       |       |
| Thiobencarb   | Quantitation | 4.918 | 0.06 | 35 | $Y = (2.29223)X + (-0.00454050)$  | 0.99999 |   | 0.350 | 1.05  | 17.54 | 4.53 | 14 | 14.03 | 21.05 |
|               | Qualifier    | 4.916 | 0.08 | 24 | $Y = (0.131831)X + (-0.00226479)$ | 0.99972 |   | 1.63  | 4.93  |       |      |    |       |       |

Pharmaceuticals organized in the table by alphabetic order

**Note 1:** Only one transition could be recorded due to their poor fragmentation
